# Supplementary material for: Cerebrospinal fluid kappa free light chains for the diagnosis of multiple sclerosis: A systematic review and meta-analysis
Source: PubMed Central journal article supplement — Mult Scler. 2022 Dec 1;29(2):169–81. doi: 10.1177/13524585221134213 (PMC9925892; doi:10.1177/13524585221134213), 2022-12-01

A) Comparison of  $\kappa$ -FLC index and OCB in MS patients

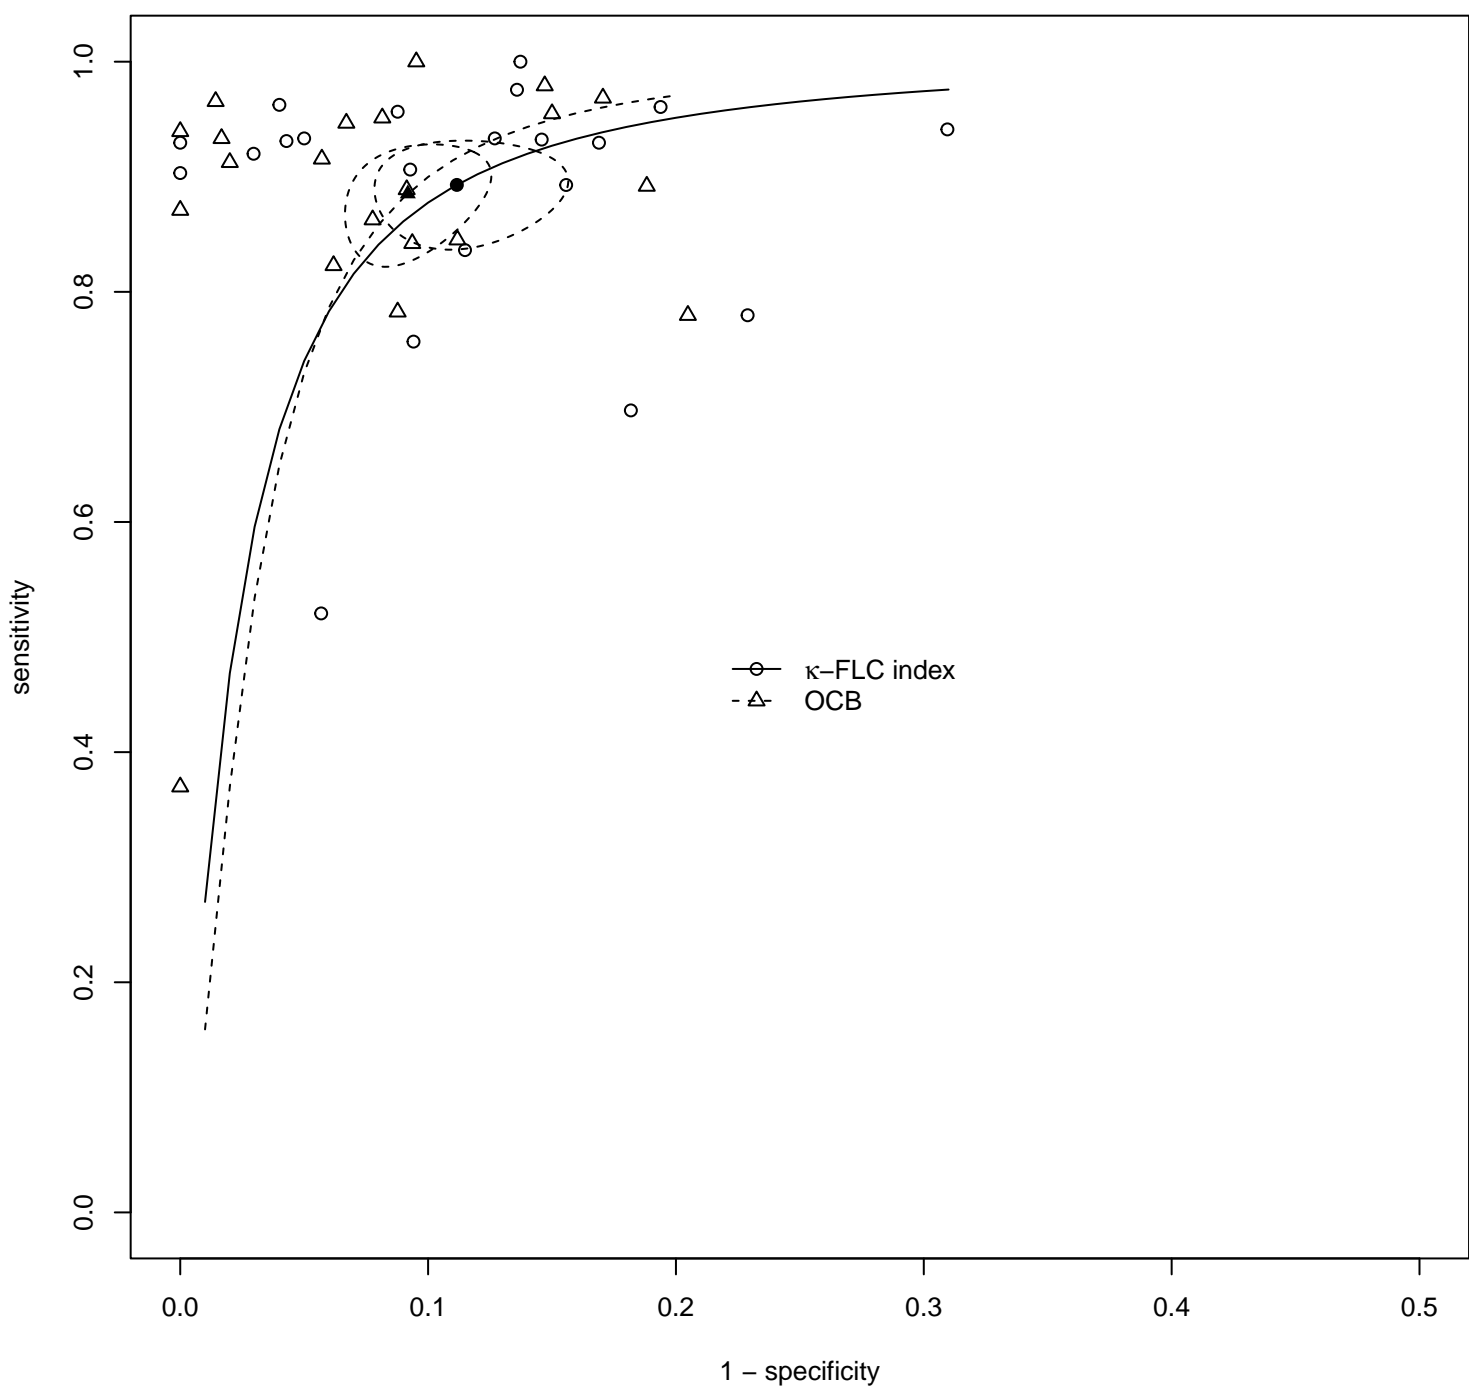

B) Comparison of  $\kappa$ -FLC index and OCB in CIS patients

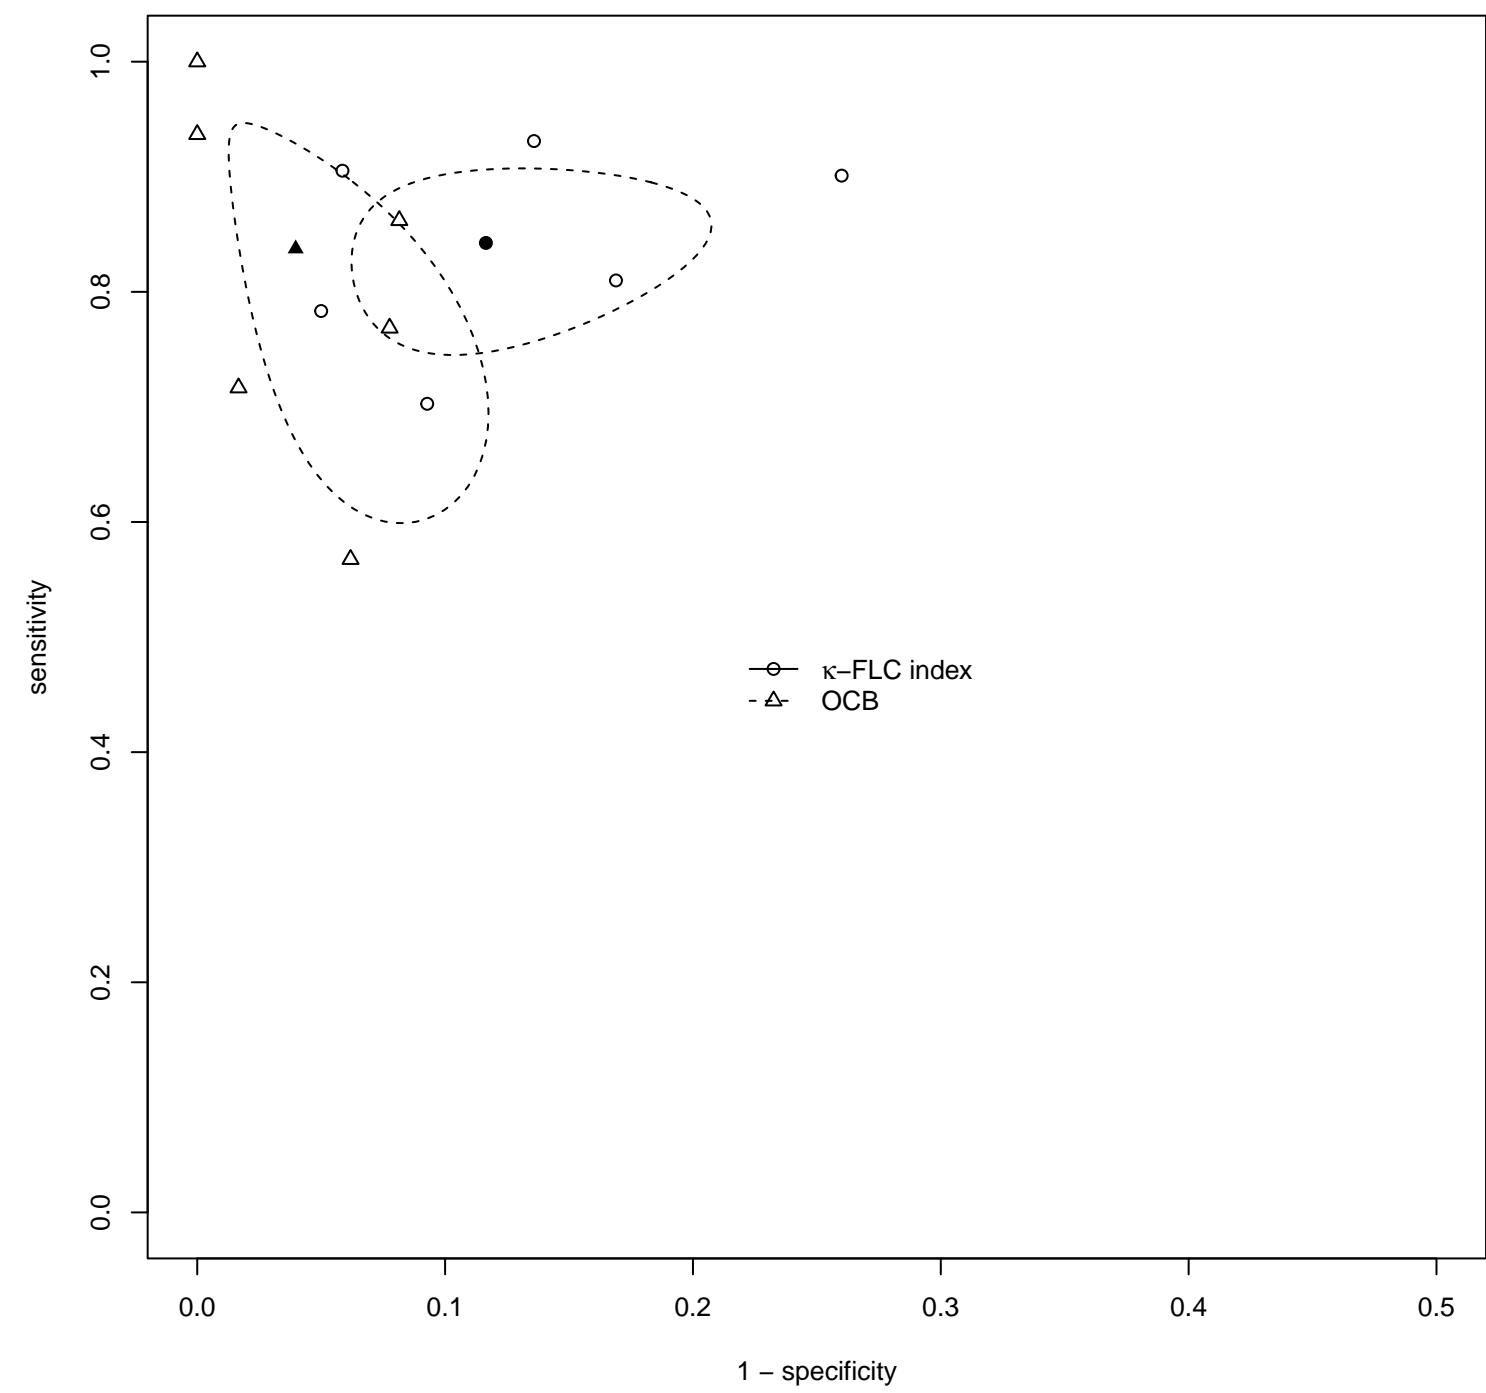

C) Comparison of  $\kappa$ -FLC index and OCB in mixed patient cohorts

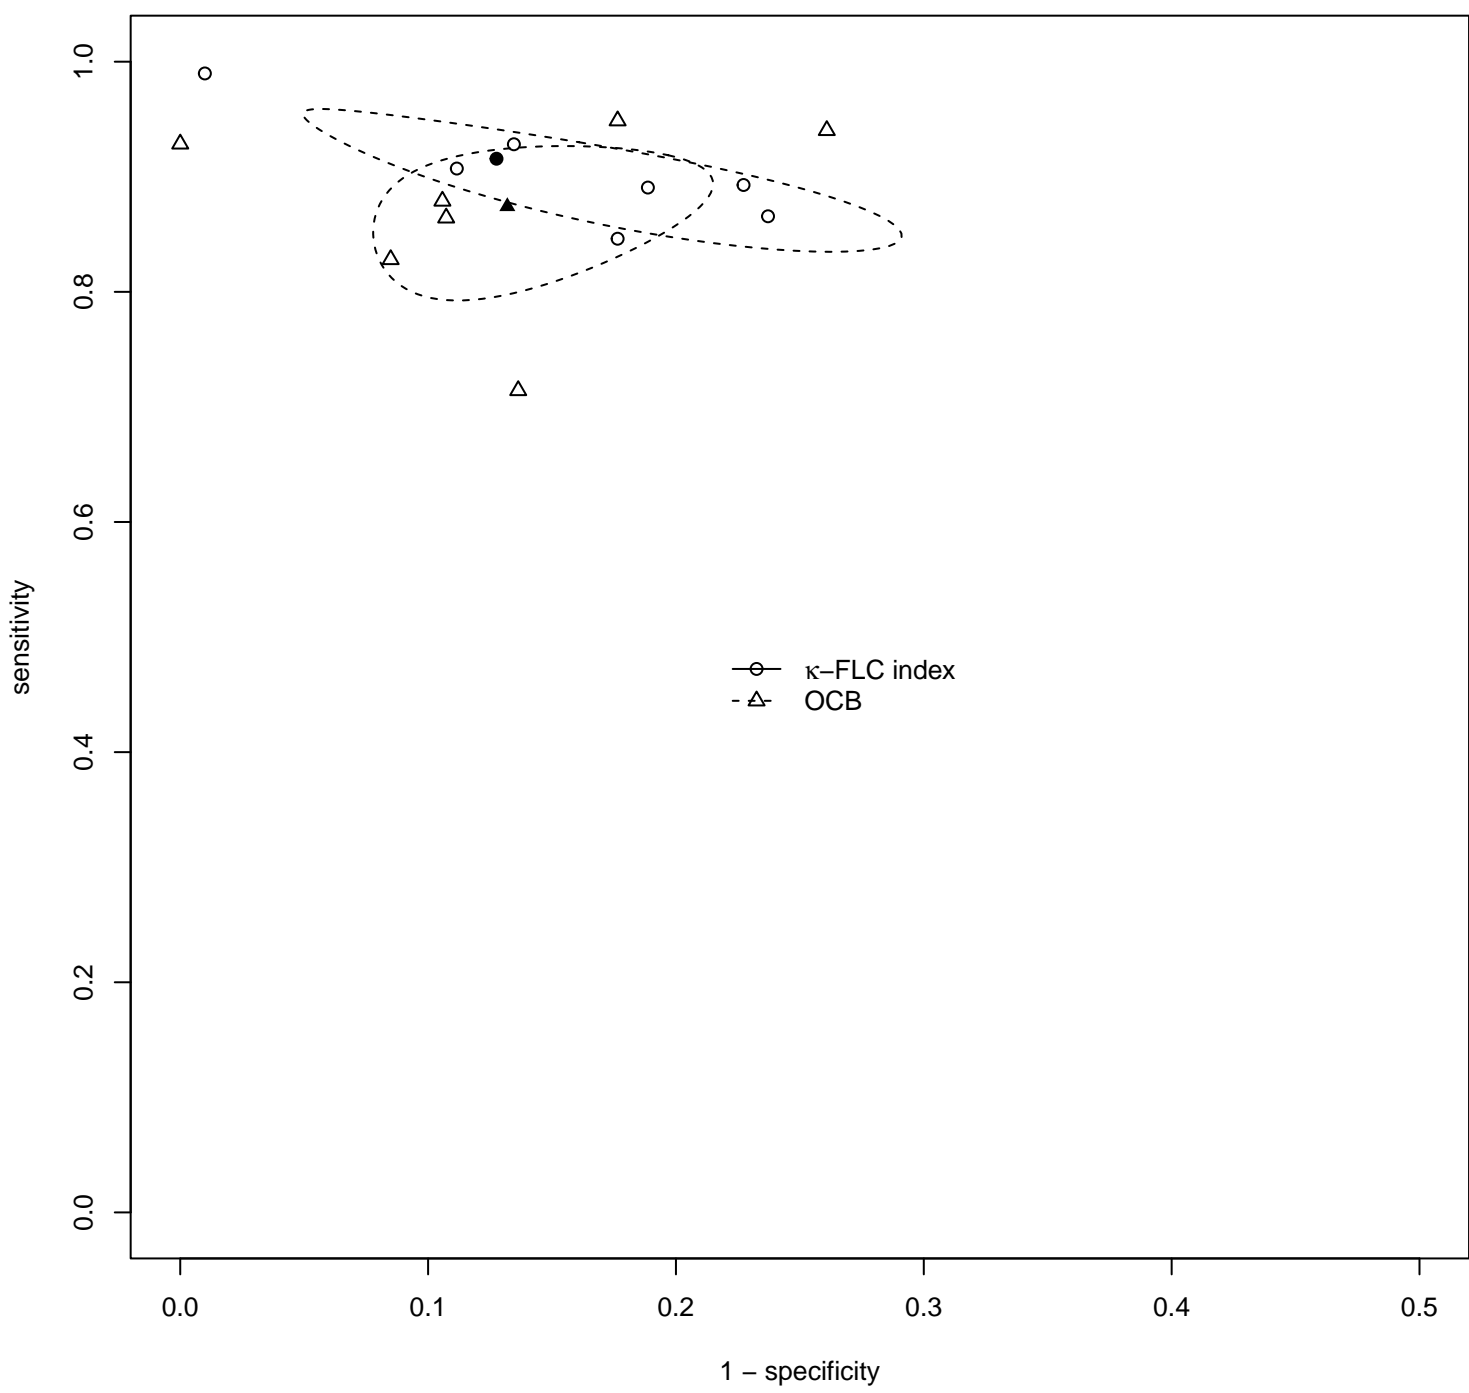

Supplement: sj-pdf-1-msj-10.1177_13524585221134213.pdf [file sj-pdf-1-msj-10.1177_13524585221134213.pdf]
