# Supplementary material for: Cerebrospinal fluid kappa free light chains for the diagnosis of multiple sclerosis: A systematic review and meta-analysis
Source: PubMed Central journal article supplement — Mult Scler. 2022 Dec 1;29(2):169–81. doi: 10.1177/13524585221134213 (PMC9925892; doi:10.1177/13524585221134213), 2022-12-01

### Q $\kappa$ -FLC

Emersic 2019    |-----■-----| 0.94 [0.86, 0.97]

Senel 2019    |-----■-----| 0.92 [0.84, 0.96]

Vasilj 2018    |-----■-----| 0.92 [0.85, 0.96]

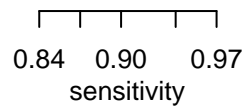

Emersic 2019    |-----■-----| 0.96 [0.87, 0.99]

Senel 2019    |-----■-----| 0.96 [0.95, 0.97]

Vasilj 2018    |-----■-----| 0.74 [0.60, 0.84]

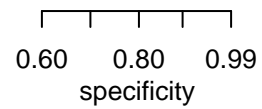

### OCB

Emersic 2019    |-----■-----| 0.91 [0.82, 0.95]

Senel 2019    |-----■-----| 0.94 [0.86, 0.98]

Vasilj 2018    |-----■-----| 1.00 [0.95, 1.00]

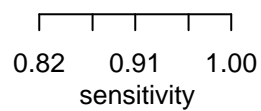

Emersic 2019    |-----■-----| 0.97 [0.88, 0.99]

Senel 2019    |-----■-----| 0.93 [0.92, 0.95]

Vasilj 2018    |-----■-----| 0.99 [0.91, 1.00]

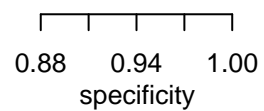

Supplement: sj-pdf-9-msj-10.1177_13524585221134213.pdf [file sj-pdf-9-msj-10.1177_13524585221134213.pdf]
