# Supplementary material for: Cerebrospinal fluid kappa free light chains for the diagnosis of multiple sclerosis: A systematic review and meta-analysis
Source: PubMed Central journal article supplement — Mult Scler. 2022 Dec 1;29(2):169–81. doi: 10.1177/13524585221134213 (PMC9925892; doi:10.1177/13524585221134213), 2022-12-01
Supplement: sj-pdf-11-msj-10.1177_13524585221134213.pdf [file sj-pdf-11-msj-10.1177_13524585221134213.pdf]

**Table S5:** Estimates, their standard errors, test statistic values, p-values and 95% confidence intervals for logit transformed sensitivity and specificity of  $\kappa$ -FLC index and OCB obtained by the bivariate mixed model as well as the retransformed sensitivity and specificity estimates.

| A)<br>Variables in the estimation equation                      | Estimate | Std. Error | z       | p-value | 95% Confidence Interval |             |
|-----------------------------------------------------------------|----------|------------|---------|---------|-------------------------|-------------|
|                                                                 |          |            |         |         | lower limit             | upper limit |
| logit(sensitivity) ( $\kappa$ -FLC index)                       | 2.053    | 0.148      | 13.863  | < 0.001 | 1.763                   | 2.344       |
| logit(sensitivity) (difference of $\kappa$ -FLC index to OCB)   | -0.136   | 0.210      | -0.646  | 0.513   | -0.547                  | 0.276       |
| logit(1- specificity) ( $\kappa$ -FLC index)                    | -2.006   | 0.122      | -16.497 | < 0.001 | -2.245                  | -1.768      |
| logit(1-specificity) (difference of $\kappa$ -FLC index to OCB) | -0.320   | 0.179      | -1.785  | 0.074   | -0.671                  | 0.031       |

| B)                  | Sensitivity (estimated mean) | Specificity (estimated mean) |
|---------------------|------------------------------|------------------------------|
| $\kappa$ -FLC index | 0.886                        | 0.881                        |
| OCB                 | 0.872                        | 0.911                        |

Legend: The bivariate mixed model is computed with the logit-transformed quantities of sensitivity and specificity and estimated via REML (restricted maximum likelihood), these estimates are provided in A). After re-transformation the quantities are easier to interpret and given in B).

*Abbreviations:* FLC, free light chain, OCB, oligoclonal bands
