# Supplementary material for: Cerebrospinal fluid kappa free light chains for the diagnosis of multiple sclerosis: A systematic review and meta-analysis
Source: PubMed Central journal article supplement — Mult Scler. 2022 Dec 1;29(2):169–81. doi: 10.1177/13524585221134213 (PMC9925892; doi:10.1177/13524585221134213), 2022-12-01
Supplement: sj-pdf-13-msj-10.1177_13524585221134213.pdf [file sj-pdf-13-msj-10.1177_13524585221134213.pdf]

**Table S7:** Estimates, their standard errors, test statistic values, p-values and 95% confidence intervals for logit transformed sensitivity and specificity of  $\kappa$ -FLC index and OCB obtained by the bivariate mixed model using CIS and MS patients separately for assay as well as the retransformed sensitivity and specificity estimates.

**1) N Latex assay**

| <b>A1)</b><br><b>Variables in the estimation equation</b>       | <b>Estimate</b> | <b>Std. Error</b> | <b>z</b> | <b>p-value</b> | <b>95% Confidence Interval</b> |                    |
|-----------------------------------------------------------------|-----------------|-------------------|----------|----------------|--------------------------------|--------------------|
|                                                                 |                 |                   |          |                | <b>lower limit</b>             | <b>upper limit</b> |
| logit(sensitivity) ( $\kappa$ -FLC index)                       | 2.551           | 0.191             | 13.354   | < 0.001        | 2.177                          | 2.925              |
| logit(sensitivity) (difference of $\kappa$ -FLC index to OCB)   | -0.066          | 0.274             | -0.240   | 0.811          | -0.603                         | 0.472              |
| logit(1- specificity) ( $\kappa$ -FLC index)                    | -2.291          | 0.314             | -7.295   | < 0.001        | -2.906                         | -1.675             |
| logit(1-specificity) (difference of $\kappa$ -FLC index to OCB) | 0.142           | 0.447             | -0.317   | 0.751          | -1.018                         | 0.735              |

| <b>B1)</b>          | <b>Sensitivity (estimated mean)</b> | <b>Specificity (estimated mean)</b> |
|---------------------|-------------------------------------|-------------------------------------|
| $\kappa$ -FLC index | 0.928                               | 0.908                               |
| OCB                 | 0.923                               | 0.919                               |

**2) Freelite assay**

| <b>A2)</b><br><b>Variables in the estimation equation</b>       | <b>Estimate</b> | <b>Std. Error</b> | <b>z</b> | <b>p-value</b> | <b>95% Confidence Interval</b> |                    |
|-----------------------------------------------------------------|-----------------|-------------------|----------|----------------|--------------------------------|--------------------|
|                                                                 |                 |                   |          |                | <b>lower limit</b>             | <b>upper limit</b> |
| logit(sensitivity) ( $\kappa$ -FLC index)                       | 1.701           | 0.209             | 8.132    | < 0.001        | 1.291                          | 2.111              |
| logit(sensitivity) (difference of $\kappa$ -FLC index to OCB)   | -0.150          | 0.298             | -0.503   | 0.615          | -0.733                         | 0.434              |
| logit(1- specificity) ( $\kappa$ -FLC index)                    | -1.914          | 0.124             | -15.424  | < 0.001        | -2.157                         | -1.671             |
| logit(1-specificity) (difference of $\kappa$ -FLC index to OCB) | -0.446          | 0.185             | -2.411   | 0.016          | -0.809                         | 0.083              |

| <b>B2)</b>          | <b>Sensitivity (estimated mean)</b> | <b>Specificity (estimated mean)</b> |
|---------------------|-------------------------------------|-------------------------------------|
| $\kappa$ -FLC index | 0.846                               | 0.871                               |
| OCB                 | 0.825                               | 0.914                               |

**Legend:** The bivariate mixed model is computed with the logit-transformed quantities of sensitivity and specificity and estimated via REML (restricted maximum likelihood), these estimates are provided in A). After re-transformation the quantities are easier to interpret and given in B). This analysis included studies with CIS and MS patients and did not include studies with mixed cohorts of CIS/MS patients.

*Abbreviations:* FLC, free light chain; OCB, oligoclonal bands
