# Supplementary material for: Cerebrospinal fluid kappa free light chains for the diagnosis of multiple sclerosis: A systematic review and meta-analysis
Source: PubMed Central journal article supplement — Mult Scler. 2022 Dec 1;29(2):169–81. doi: 10.1177/13524585221134213 (PMC9925892; doi:10.1177/13524585221134213), 2022-12-01
Supplement: sj-pdf-14-msj-10.1177_13524585221134213.pdf [file sj-pdf-14-msj-10.1177_13524585221134213.pdf]

**Table S8:** Estimates, their standard errors, test statistic values, p-values and 95% confidence intervals for logit transformed sensitivity and specificity of  $\kappa$ -FLC index and OCB obtained by the bivariate mixed model separately for MS and CIS patients as well as the retransformed sensitivity and specificity estimates.

**1) MS patients**

| <b>A1)</b><br><b>Variables in the estimation equation</b>       | <b>Estimate</b> | <b>Std. Error</b> | <b>z</b> | <b>p-value</b> | <b>95% Confidence Interval</b> |                    |
|-----------------------------------------------------------------|-----------------|-------------------|----------|----------------|--------------------------------|--------------------|
|                                                                 |                 |                   |          |                | <b>lower limit</b>             | <b>upper limit</b> |
| logit(sensitivity) ( $\kappa$ -FLC index)                       | 2.126           | 0.206             | 10.331   | < 0.001        | 1.723                          | 2.530              |
| logit(sensitivity) (difference of $\kappa$ -FLC index to OCB)   | -0.083          | 0.291             | -0.286   | 0.775          | -0.653                         | 0.487              |
| logit(1- specificity) ( $\kappa$ -FLC index)                    | -2.059          | 0.149             | -13.797  | < 0.001        | -2.352                         | -1.767             |
| logit(1-specificity) (difference of $\kappa$ -FLC index to OCB) | -0.257          | 0.217             | -1.189   | 0.235          | -0.682                         | 0.167              |

| <b>B1)</b>          | <b>Sensitivity (estimated mean)</b> | <b>Specificity (estimated mean)</b> |
|---------------------|-------------------------------------|-------------------------------------|
| $\kappa$ -FLC index | 0.893                               | 0.887                               |
| OCB                 | 0.885                               | 0.910                               |

**2) CIS patients**

| <b>A2)</b><br><b>Variables in the estimation equation</b>       | <b>Estimate</b> | <b>Std. Error</b> | <b>z</b> | <b>p-value</b> | <b>95% Confidence Interval</b> |                    |
|-----------------------------------------------------------------|-----------------|-------------------|----------|----------------|--------------------------------|--------------------|
|                                                                 |                 |                   |          |                | <b>lower limit</b>             | <b>upper limit</b> |
| logit(sensitivity) ( $\kappa$ -FLC index)                       | 1.671           | 0.334             | 5.004    | < 0.001        | 1.017                          | 2.326              |
| logit(sensitivity) (difference of $\kappa$ -FLC index to OCB)   | -0.165          | 0.486             | -0.338   | 0.735          | -1.117                         | 0.788              |
| logit(1- specificity) ( $\kappa$ -FLC index)                    | -1.979          | 0.281             | -7.049   | < 0.001        | -2.529                         | -1.429             |
| logit(1-specificity) (difference of $\kappa$ -FLC index to OCB) | -0.986          | 0.446             | -2.213   | 0.027          | -1.859                         | -0.113             |

| <b>B2)</b>          | <b>Sensitivity (estimated mean)</b> | <b>Specificity (estimated mean)</b> |
|---------------------|-------------------------------------|-------------------------------------|
| $\kappa$ -FLC index | 0.842                               | 0.879 <sup>a</sup>                  |
| OCB                 | 0.818                               | 0.951 <sup>a</sup>                  |

Note: <sup>a</sup> this difference is statistically significant ( $p = 0.027$ ).

**Legend:** The bivariate mixed model is computed with the logit-transformed quantities of sensitivity and specificity and estimated via REML (restricted maximum likelihood), these estimates are provided in A). After re-transformation the quantities are easier to interpret and given in B). This analysis included studies with CIS and MS patients and did not include studies with mixed cohorts of CIS/MS patients.

*Abbreviations:* CIS, clinically isolated syndrome; FLC, free light chain; MS, multiple sclerosis; OCB, oligoclonal bands
