# Supplementary material for: Cerebrospinal fluid kappa free light chains for the diagnosis of multiple sclerosis: A systematic review and meta-analysis
Source: PubMed Central journal article supplement — Mult Scler. 2022 Dec 1;29(2):169–81. doi: 10.1177/13524585221134213 (PMC9925892; doi:10.1177/13524585221134213), 2022-12-01
Supplement: sj-pdf-15-msj-10.1177_13524585221134213.pdf [file sj-pdf-15-msj-10.1177_13524585221134213.pdf]

**Table S1: Evidence of studies on  $\kappa$ -FLC index in patients with clinically isolated syndrome and multiple sclerosis**

| Reference                 | No. of patients | No. of controls | MS diagnostic criteria | Type of controls     | No. of $\kappa$ -FLC positive patients | No. of $\kappa$ -FLC negative controls | $\kappa$ -FLC cut-off | $\kappa$ -FLC assay | Method | Analyzer | No. of OCB positive patients | No. of OCB negative controls | OCB cut-off | Prior corticosteroids | Prior DMT | Sensitivity $\kappa$ -FLC | Specificity $\kappa$ -FLC | Sensitivity OCB | Specificity OCB |
|---------------------------|-----------------|-----------------|------------------------|----------------------|----------------------------------------|----------------------------------------|-----------------------|---------------------|--------|----------|------------------------------|------------------------------|-------------|-----------------------|-----------|---------------------------|---------------------------|-----------------|-----------------|
| <b>Multiple Sclerosis</b> |                 |                 |                        |                      |                                        |                                        |                       |                     |        |          |                              |                              |             |                       |           |                           |                           |                 |                 |
| Desplat-Jego 2005         | 33              | 33              | 2001                   | NIND, IND            | 23                                     | 27                                     | 20,00                 | Freelite            | Ne     | Behring  | 31                           | 33                           |             |                       |           | 70                        | 82                        | 94              | 100             |
| Presslauer 2008           | 41              | 368             | 2001 / 2005            | NIND                 | 40                                     | 318                                    | 5,90                  | Freelite            | Ne     | Behring  | 39                           | 338                          |             |                       |           | 98                        | 86                        | 95              | 92              |
| Duranti 2013              | 23              | 57              | 2010                   | NIND, IND            | 22                                     | 52                                     | 12,00                 | N Latex             | Ne     | Behring  | 18                           | 52                           | 2           | no                    | no        | 96                        | 91                        | 78              | 91              |
| Menendez-Valladares 2015  | 29              | 70              |                        | NIND, IND            | 27                                     | 67                                     | 10,62                 | Freelite            | Ne     | Behring  | 28                           | 69                           |             |                       |           | 93                        | 96                        | 97              | 99              |
| Presslauer 2016           | 60              | 60              | 2005                   | NIND, PIND           | 56                                     | 57                                     | 5,90                  | Freelite            | Ne     | Behring  | 56                           | 59                           |             | yes                   | yes       | 93                        | 95                        | 93              | 98              |
| Crespi 2017               | 48              | 102             | 2010                   | NIND, IND, PIND, NND | 48                                     | 88                                     | 5,00                  | N Latex             | Ne     | Behring  | 47                           | 87                           |             | no                    | no        | 100                       | 86                        | 98              | 85              |
| Pieri 2017                | 71              | 105             |                        | NIND, IND            | 66                                     | 105                                    | 12,30                 | N Latex             | Ne     | Behring  | 65                           | 99                           |             |                       |           | 93                        | 100                       | 92              | 94              |
| Bayart 2018               | 59              | 83              |                        | NIND, IND            | 46                                     | 64                                     | 12,45                 | Freelite            | Tu     | SPAPLUS  | 46                           | 66                           | 2           | no                    | no        | 78                        | 77                        | 78              | 80              |
| Christiansen 2018         | 96              | 97              | 2010                   | SC, OND              | 87                                     | 88                                     | 7,50                  | Freelite            | Tu     | SPAPLUS  | 79                           | 91                           |             |                       |           | 91                        | 91                        | 82              | 94              |
| Valencia-Vera 2018        | 37              | 85              |                        | OND                  | 28                                     | 77                                     | 5,90                  | Freelite            | Ne     | Behring  | 33                           | 69                           |             | no                    | no        | 76                        | 91                        | 89              | 81              |
| Crespi 2019               | 127             | 258             | 2017                   | NIND, IND            | 122                                    | 208                                    | 5,00                  | N Latex             | Ne     | Behring  | 123                          | 214                          |             |                       |           | 96                        | 81                        | 97              | 83              |
| Emersic 2019              | 80              | 50              | 2010                   | NIND                 | 77                                     | 48                                     | 5,30                  | N Latex             | Ne     | Behring  | 73                           | 49                           | 2           |                       |           | 96                        | 96                        | 91              | 98              |
| Schwenkenbecher 2019      | 100             |                 | 2017                   |                      | 96                                     |                                        | 5,90                  | N Latex             | Ne     | Behring  | 99                           |                              |             |                       |           | 96                        |                           | 99              |                 |
| Senel 2019                | 75              | 1149            | 2010                   | NIND, IND, PIND      | 69                                     | 1115                                   | 9,58                  | N Latex             | Ne     | Behring  | 71                           | 1072                         | 2           |                       |           | 92                        | 97                        | 95              | 93              |
| Duell 2020                | 62              | 60              | 2010                   | SC, HC               | 56                                     | 60                                     | 7,15                  | N Latex             | Ne     | Behring  | 54                           | 60                           | 2           |                       |           | 90                        | 100                       | 87              | 100             |
| Gudowska-Sawczuk 2020     | 34              | 42              | 2017                   | OND                  | 32                                     | 29                                     | 9,42                  | Freelite            | Tu     | Optilite | 34                           | 38                           |             | no                    | no        | 94                        | 68                        | 100             | 90              |
| Ferraro 2020a             | 146             | 299             | 2010 / 2017            | NIND, IND, PIND      | 76                                     | 282                                    | 5,80                  | Freelite            | Tu     | Optilite | 54                           | 299                          | 2           |                       |           | 52                        | 94                        | 37              | 100             |
| Ferraro 2020b             | 84              | 456             | 2017                   | NIND, IND            | 75                                     | 385                                    | 6,20                  | Freelite            | Tu     | Optilite | 71                           | 405                          |             |                       |           | 89                        | 84                        | 85              | 89              |
| Leurs 2020                | 284             | 219             | 2005 / 2010            | NIND, IND, SC, HC    | 264                                    | 182                                    | 6,60                  | Freelite            | Tu     | Optilite | 245                          | 202                          |             | yes                   | yes       | 93                        | 83                        | 86              | 92              |
| Vecchio 2020              | 133             | 240             | 2017                   | NIND, IND            | 124                                    | 205                                    | 5,00                  | N Latex             | Ne     | Behring  | 127                          | 204                          |             |                       |           | 93                        | 85                        | 95              | 85              |

|                                                                                                   |     |     |                    |                   |     |     |       |          |    |          |     |     |   |     |     |    |    |     |     |
|---------------------------------------------------------------------------------------------------|-----|-----|--------------------|-------------------|-----|-----|-------|----------|----|----------|-----|-----|---|-----|-----|----|----|-----|-----|
| Sanz Diaz 2021                                                                                    | 45  | 197 | 2017               | NIND, IND, PIND   | 42  | 172 | 6,60  | Freelite | Tu | Optilite | 40  | 179 | 2 |     |     | 93 | 87 | 89  | 91  |
| Bernardi 2022                                                                                     | 171 | 235 | 2017               | NIND, IND, PIND   | 143 | 208 | 6,40  | Freelite | Tu | Optilite | 144 | 213 | 2 |     |     | 84 | 89 | 84  | 91  |
| <b>Clinically isolated syndrome</b>                                                               |     |     |                    |                   |     |     |       |          |    |          |     |     |   |     |     |    |    |     |     |
| Presslauer 2008                                                                                   | 29  | 368 | 2001 / 2005        | NIND              | 27  | 318 | 5,90  | Freelite | Ne | Behring  | 25  | 338 |   |     |     | 93 | 86 | 86  | 92  |
| Menendez-Valladares 2015                                                                          | 77  |     |                    | NIND, IND         | 49  |     | 10,62 | Freelite | Ne | Behring  | 48  |     |   |     |     | 64 |    | 62  |     |
| Presslauer 2016                                                                                   | 60  | 60  | 2005               | NIND, PIND        | 47  | 57  | 5,90  | Freelite | Ne | Behring  | 43  | 59  |   | yes | no  | 78 | 95 | 72  | 98  |
| Christiansen 2018                                                                                 | 37  | 97  | 2010               | SC, OND           | 26  | 88  | 7,50  | Freelite | Tu | SPAPLUS  | 21  | 91  |   | no  | no  | 70 | 91 | 57  | 94  |
| Vasilij 2018                                                                                      | 101 | 50  | 2017               | OND               | 91  | 37  | 9,09  | N Latex  | Ne | Behring  | 101 | 50  |   |     |     | 90 | 73 | 100 | 100 |
| Reiber 2019                                                                                       | 95  | 256 |                    | OND               | 86  | 241 | 5,00  |          |    |          | 89  | 256 | 2 |     |     | 90 | 94 | 94  | 100 |
| Schwenkenbecher 2019                                                                              | 68  |     | 2017               |                   | 26  |     | 5,90  | N Latex  | Ne | Behring  | 32  |     |   |     |     | 38 |    | 47  |     |
| Leurs 2020                                                                                        | 242 | 219 | 2005 / 2010        | NIND, IND, SC, HC | 196 | 182 | 6,60  | Freelite | Tu | Optilite | 186 | 202 |   | yes | yes | 81 | 83 | 77  | 92  |
| <b>Mixed cohorts comprising patients with clinically isolated syndrome and multiple sclerosis</b> |     |     |                    |                   |     |     |       |          |    |          |     |     |   |     |     |    |    |     |     |
| Passerini 2016                                                                                    | 56  | 44  | 2010               | NIND, IND         | 50  | 34  | 2,40  | N Latex  | Ne | Behring  | 40  | 38  |   |     |     | 89 | 77 | 71  | 86  |
| Gurtner 2018                                                                                      | 67  | 253 | 2010               | NIND, IND         | 58  | 193 | 10,46 | Freelite | Ne | Behring  | 63  | 187 | 2 |     |     | 87 | 76 | 94  | 74  |
| Agnello 2020                                                                                      | 39  | 17  | 2017               | NIND, IND         | 33  | 14  | 7,30  | Freelite | Tu | Optilite | 37  | 14  | 2 | no  | no  | 85 | 82 | 95  | 82  |
| Cavalla 2020                                                                                      | 140 | 233 | 2017               | NMOSD, IND, OND   | 127 | 207 | 6,15  | N Latex  | Ne | Behring  | 121 | 208 |   |     |     | 90 | 89 | 86  | 89  |
| Gaetani 2020                                                                                      | 64  | 106 | 2010               | NIND, IND         | 57  | 86  | 7,83  | Freelite | Ne | Behring  | 53  | 97  | 2 |     |     | 89 | 81 | 83  | 92  |
| Suesse 2020                                                                                       | 98  | 302 | 2005 / 2010 / 2017 | NIND, PIND, SC    | 97  | 299 | 6,60  | N Latex  | Ne | Behring  | 91  | 302 | 2 |     |     | 99 | 99 | 93  | 100 |
| Berek 2021                                                                                        | 88  |     | 2017               |                   | 76  |     | 6,60  | N Latex  | Ne | Behring  | 79  |     | 2 | yes | no  | 86 |    | 90  |     |
| Rosenstein 2021                                                                                   | 223 | 104 | 2017               | IND, SC           | 207 | 90  | 4,60  | N Latex  | Ne | Behring  | 196 | 93  |   |     |     | 93 | 87 | 88  | 89  |

**Table S2: Evidence of studies on intrathecal  $\kappa$ -FLC fraction in patients with clinically isolated syndrome and multiple sclerosis**

| Reference                                                                                         | No. of patients | No. of controls | MS diagnostic criteria | Type of controls | No. of $\kappa$ -FLC positive patients | No. of $\kappa$ -FLC negative controls | $\kappa$ -FLC cut-off | $\kappa$ -FLC assay | Method | Analyzer | No. of OCB positive patients | No. of OCB negative controls | OCB cut-off | Prior cortico-steroids | Prior DMT | Sensitivity $\kappa$ -FLC | Specificity $\kappa$ -FLC | Sensitivity OCB | Specificity OCB |
|---------------------------------------------------------------------------------------------------|-----------------|-----------------|------------------------|------------------|----------------------------------------|----------------------------------------|-----------------------|---------------------|--------|----------|------------------------------|------------------------------|-------------|------------------------|-----------|---------------------------|---------------------------|-----------------|-----------------|
| <b>Multiple Sclerosis</b>                                                                         |                 |                 |                        |                  |                                        |                                        |                       |                     |        |          |                              |                              |             |                        |           |                           |                           |                 |                 |
| Presslauer 2016                                                                                   | 60              | 60              | 2005                   | NIND, PIND       | 57                                     | 57                                     | 0,00                  | Freelite            | Ne     | Behring  | 56                           | 59                           |             | yes                    | yes       | 95                        | 95                        | 93              | 98              |
| Puthenparampil 2018                                                                               | 70              | 37              | 2017                   | HC               | 46                                     | 37                                     | 0,00                  | Freelite            | Ne     | Behring  | 40                           | 37                           |             |                        |           | 66                        | 100                       | 57              | 100             |
| Crespi 2019                                                                                       | 127             | 258             | 2017                   | NIND, IND        | 122                                    | 208                                    | 0,00                  | N Latex             | Ne     | Behring  | 123                          | 214                          |             |                        |           | 96                        | 81                        | 97              | 83              |
| Emersic 2019                                                                                      | 80              | 50              | 2010                   | NIND             | 76                                     | 48                                     | 10,00                 | N Latex             | Ne     | Behring  | 73                           | 49                           | 2           |                        |           | 95                        | 96                        | 91              | 98              |
| Schwenkenbecher 2019                                                                              | 100             |                 | 2017                   |                  | 98                                     |                                        | 0,00                  | N Latex             | Ne     | Behring  | 99                           |                              |             |                        |           | 98                        |                           | 99              |                 |
| Senel 2019                                                                                        | 75              | 1149            | 2010                   | NIND, IND, PIND  | 70                                     | 1077                                   | 0,00                  | N Latex             | Ne     | Behring  | 71                           | 1072                         | 2           |                        |           | 93                        | 94                        | 95              | 93              |
| Duell 2020                                                                                        | 62              | 60              | 2010                   | HC, SC           | 59                                     | 58                                     | 0,00                  | N Latex             | Ne     | Behring  | 54                           | 60                           | 2           |                        |           | 95                        | 97                        | 87              | 100             |
| Ferraro 2020b                                                                                     | 84              | 456             | 2017                   | NIND, IND        | 77                                     | 324                                    | 0,00                  | Freelite            | Tu     | Optilite | 71                           | 405                          |             |                        |           | 92                        | 71                        | 85              | 89              |
| Vecchio 2020                                                                                      | 133             | 240             | 2017                   | NIND, IND        | 130                                    | 128                                    | 0,00                  | N Latex             | Ne     | Behring  | 127                          | 204                          |             |                        |           | 98                        | 53                        | 95              | 85              |
| <b>Clinically isolated syndrome</b>                                                               |                 |                 |                        |                  |                                        |                                        |                       |                     |        |          |                              |                              |             |                        |           |                           |                           |                 |                 |
| Presslauer 2016                                                                                   | 60              | 60              | 2005                   | NIND, PIND       | 49                                     | 57                                     | 0,00                  | Freelite            | Ne     | Behring  | 43                           | 59                           |             | yes                    | no        | 82                        | 95                        | 72              | 98              |
| Reiber 2019                                                                                       | 95              | 256             |                        | OND              | 88                                     | 236                                    | 0,00                  |                     |        |          | 89                           | 256                          | 2           |                        |           | 93                        | 92                        | 94              | 100             |
| Schwenkenbecher 2019                                                                              | 68              |                 | 2017                   |                  | 30                                     |                                        | 0,00                  | N Latex             | Ne     | Behring  | 32                           |                              |             |                        |           | 44                        |                           | 47              |                 |
| <b>Mixed cohorts comprising patients with clinically isolated syndrome and multiple sclerosis</b> |                 |                 |                        |                  |                                        |                                        |                       |                     |        |          |                              |                              |             |                        |           |                           |                           |                 |                 |
| Gurtner 2018                                                                                      | 67              | 253             | 2010                   | NIND, IND        | 64                                     | 172                                    | 0,00                  | Freelite            | Ne     | Behring  | 63                           | 187                          | 2           |                        |           | 96                        | 68                        | 94              | 74              |
| Suesse 2020                                                                                       | 26              | 14              | 2017                   | NIND             | 25                                     | 12                                     | 0,00                  | N Latex             | Ne     | Behring  | 23                           | 14                           |             |                        | no        | 96                        | 86                        | 88              | 100             |
| Suesse 2020                                                                                       | 98              | 302             | 2005 / 2010 / 2017     | NIND, PIND, SC   | 98                                     | 282                                    | 0,00                  | N Latex             | Ne     | Behring  | 91                           | 302                          | 2           |                        |           | 100                       | 93                        | 93              | 100             |
| Rosenstein 2021                                                                                   | 223             | 104             | 2017                   | IND, SC          | 214                                    | 85                                     | 0,00                  | N Latex             | Ne     | Behring  | 197                          | 93                           |             |                        |           | 96                        | 82                        | 88              | 89              |

**Table S3: Evidence of studies on CSF  $\kappa$ -FLC concentration in patients with clinically isolated syndrome and multiple sclerosis**

| Reference                                                                                         | No. of patients | No. of controls | MS diagnostic criteria | Type of controls | No. of $\kappa$ -FLC positive patients | No. of $\kappa$ -FLC negative controls | $\kappa$ -FLC cut-off | $\kappa$ -FLC assay | Method | Analyzer | No. of OCB positive patients | No. of OCB negative controls | OCB cut-off | Prior corticosteroids | Prior DMT | Sensitivity $\kappa$ -FLC | Specificity $\kappa$ -FLC | Sensitivity OCB | Specificity OCB |
|---------------------------------------------------------------------------------------------------|-----------------|-----------------|------------------------|------------------|----------------------------------------|----------------------------------------|-----------------------|---------------------|--------|----------|------------------------------|------------------------------|-------------|-----------------------|-----------|---------------------------|---------------------------|-----------------|-----------------|
| <b>Multiple Sclerosis</b>                                                                         |                 |                 |                        |                  |                                        |                                        |                       |                     |        |          |                              |                              |             |                       |           |                           |                           |                 |                 |
| Christiansen 2018                                                                                 | 96              | 97              | 2010                   | SC, OND          | 84                                     | 86                                     | 0,82                  | Freelite            | Tu     | SPAPLUS  | 79                           | 91                           |             | no                    | no        | 88                        | 89                        | 82              | 94              |
| Emersic 2019                                                                                      | 80              | 50              | 2010                   | NIND             | 76                                     | 45                                     | 0,30                  | N Latex             | Ne     | Behring  | 73                           | 49                           | 2           |                       |           | 95                        | 90                        | 91              | 98              |
| Saez 2019                                                                                         | 41              | 42              | 2010 / 2017            | NIND             | 39                                     | 41                                     | 7,10                  | Freelite            | Tu     | SPAPLUS  | 38                           | 38                           |             | no                    | no        | 95                        | 97                        | 93              | 90              |
| Duell 2020                                                                                        | 62              | 60              | 2010                   | HC, SC           | 55                                     | 59                                     | 0,47                  | N Latex             | Ne     | Behring  | 54                           | 60                           | 2           |                       |           | 89                        | 98                        | 87              | 100             |
| Vecchio 2020                                                                                      | 133             | 240             | 2017                   | NIND, IND        | 105                                    | 234                                    |                       | N Latex             | Ne     | Behring  | 127                          | 204                          |             |                       |           | 79                        | 98                        | 95              | 85              |
| Saadeh 2021                                                                                       | 84              | 602             | 2010                   | OND              | 57                                     | 518                                    | 1,00                  | Freelite            | Ne     | Behring  | 63                           | 527                          |             |                       |           | 68                        | 86                        | 75              | 88              |
| Saadeh 2021                                                                                       | 70              | 583             | 2010                   | OND              | 55                                     | 508                                    | 1,00                  | Freelite            | Ne     | Behring  | 55                           | 521                          |             |                       |           | 79                        | 87                        | 79              | 89              |
| <b>Clinically isolated syndrome</b>                                                               |                 |                 |                        |                  |                                        |                                        |                       |                     |        |          |                              |                              |             |                       |           |                           |                           |                 |                 |
| Hassan-Smith 2014                                                                                 | 21              | 21              | 2010                   | OND, IND         | 20                                     | 21                                     | 0,99                  | Freelite            | Ne     | Behring  | 18                           | 20                           |             | yes                   | no        | 95                        | 100                       | 86              | 95              |
| Christiansen 2018                                                                                 | 37              | 97              | 2010                   | SC, OND          | 25                                     | 86                                     | 0,82                  | Freelite            | Tu     | SPAPLUS  | 21                           | 91                           |             | no                    | no        | 68                        | 89                        | 57              | 94              |
| Vasilj 2018                                                                                       | 101             | 50              | 2017                   | OND              | 95                                     | 35                                     | 0,38                  | N Latex             | Ne     | Behring  | 101                          | 50                           |             |                       |           | 94                        | 70                        | 100             | 100             |
| <b>Mixed cohorts comprising patients with clinically isolated syndrome and multiple sclerosis</b> |                 |                 |                        |                  |                                        |                                        |                       |                     |        |          |                              |                              |             |                       |           |                           |                           |                 |                 |
| Hassan-Smith 2014                                                                                 | 53              | 107             | 2010                   | OND, IND         | 51                                     | 105                                    | 0,87                  | Freelite            | Ne     | Behring  | 47                           | 106                          |             | yes                   | yes       | 96                        | 98                        | 89              | 99              |
| Passerini 2016                                                                                    | 56              | 44              | 2010                   | NIND, IND        | 37                                     | 34                                     | 4,10                  | N Latex             | Ne     | Behring  | 40                           | 38                           |             |                       |           | 66                        | 77                        | 71              | 86              |
| Gurtner 2018                                                                                      | 67              | 258             | 2010                   | NIND, IND        | 62                                     | 185                                    | 0,53                  | Freelite            | Ne     | Behring  | 63                           | 187                          | 2           |                       |           | 93                        | 72                        | 94              | 72              |

**Table S4: Evidence of studies on CSF/ serum  $\kappa$ -FLC quotient in patients with clinically isolated syndrome and multiple sclerosis**

| Reference                           | No. of patients | No. of controls | MS diagnostic criteria | Type of controls | No. of $\kappa$ -FLC positive patients | No. of $\kappa$ -FLC negative controls | $\kappa$ -FLC cut-off | $\kappa$ -FLC assay | Method | Analyzer | No. of OCB positive patients | No. of OCB negative controls | OCB cut-off | Prior cortico-steroids | Prior DMT | Sensitivity $\kappa$ -FLC | Specificity $\kappa$ -FLC | Sensitivity OCB | Specificity OCB |
|-------------------------------------|-----------------|-----------------|------------------------|------------------|----------------------------------------|----------------------------------------|-----------------------|---------------------|--------|----------|------------------------------|------------------------------|-------------|------------------------|-----------|---------------------------|---------------------------|-----------------|-----------------|
| <b>Multiple Sclerosis</b>           |                 |                 |                        |                  |                                        |                                        |                       |                     |        |          |                              |                              |             |                        |           |                           |                           |                 |                 |
| Emersic 2019                        | 80              | 50              | 2010                   | NIND             | 75                                     | 48                                     | 30,00                 | N Latex             | Ne     | Behring  | 73                           | 49                           | 2           |                        |           | 94                        | 96                        | 91              | 98              |
| Senel 2019                          | 75              | 1149            | 2010                   | NIND, IND, PIND  | 69                                     | 1102                                   | 60,00                 | N Latex             | Ne     | Behring  | 71                           | 1072                         | 2           |                        |           | 92                        | 96                        | 95              | 93              |
| <b>Clinically isolated syndrome</b> |                 |                 |                        |                  |                                        |                                        |                       |                     |        |          |                              |                              |             |                        |           |                           |                           |                 |                 |
| Vasilij 2018                        | 101             | 50              | 2017                   | OND              | 93                                     | 37                                     | 49,00                 | N Latex             | Ne     | Behring  | 101                          | 50                           |             |                        |           | 92                        | 73                        | 100             | 100             |

**Legend:**

All studies used CSF and serum samples, apart from Duell et al. 2020 and Senel et al. 2020 that used CSF and plasma samples; Menendez-Valladares did not specify the type of blood sample. *Abbreviations:* DMT, disease-modifying treatment; FLC, free light chain; HC, healthy control; IND, inflammatory neurological disease; MS, multiple sclerosis; Ne, nephelometry; NIND, non-inflammatory neurological disease; NND, non-neurological disease; No., number; PIND, peripheral inflammatory neurological disease; OCB, oligoclonal bands; OND, other neurological disease; SC, symptomatic control; Tu, turbidimetry
