# Supplementary material for: Cerebrospinal fluid kappa free light chains for the diagnosis of multiple sclerosis: A systematic review and meta-analysis
Source: PubMed Central journal article supplement — Mult Scler. 2022 Dec 1;29(2):169–81. doi: 10.1177/13524585221134213 (PMC9925892; doi:10.1177/13524585221134213), 2022-12-01
Supplement: sj-pdf-16-msj-10.1177_13524585221134213.pdf [file sj-pdf-16-msj-10.1177_13524585221134213.pdf]

**Table S9:** Estimates, their standard (std.) errors, test statistic values (z), p-values and 95% confidence intervals for logit transformed sensitivity and specificity of  $\kappa$ -FLC index dependent on platform obtained by the bivariate mixed model as well as the retransformed sensitivity and specificity estimates.

| A)<br>Variables in the estimation equation                        | Estimate | Std. Error | z      | p-value | 95% Confidence Interval |             |
|-------------------------------------------------------------------|----------|------------|--------|---------|-------------------------|-------------|
|                                                                   |          |            |        |         | lower limit             | upper limit |
| logit(sensitivity) ( $\kappa$ -FLC index)                         | 1.631    | 0.216      | 7.542  | < 0.001 | 1.207                   | 2.055       |
| logit(sensitivity) (difference of turbidimetry to nephelometry)   | 0.638    | 0.275      | 2.324  | 0.020   | 0.100                   | 1.176       |
| logit(1- specificity) ( $\kappa$ -FLC index)                      | -1.777   | 0.218      | -8.141 | < 0.001 | -2.205                  | -1.349      |
| logit(1-specificity) (difference of turbidimetry to nephelometry) | -0.340   | 0.274      | -1.241 | 0.215   | -0.877                  | 0.197       |

Note: The reference is Turbidimetry.

| B)                  | Platform     | Sensitivity (estimated mean) | Specificity (estimated mean) |
|---------------------|--------------|------------------------------|------------------------------|
| $\kappa$ -FLC index | Turbidimetry | 0.836 <sup>a</sup>           | 0.855                        |
|                     | Nephelometry | 0.906 <sup>a</sup>           | 0.893                        |

Note: <sup>a</sup> this difference is statistically significant ( $p = 0.020$ ).

Legend: The bivariate mixed model is computed with the logit-transformed quantities of sensitivity and specificity and estimated via REML (restricted maximum likelihood), these estimates are provided in A). After re-transformation the quantities are easier to interpret and given in B).

*Abbreviations:* FLC, free light chain
