# Supplementary material for: Cerebrospinal fluid kappa free light chains for the diagnosis of multiple sclerosis: A systematic review and meta-analysis
Source: PubMed Central journal article supplement — Mult Scler. 2022 Dec 1;29(2):169–81. doi: 10.1177/13524585221134213 (PMC9925892; doi:10.1177/13524585221134213), 2022-12-01
Supplement: sj-pdf-17-msj-10.1177_13524585221134213.pdf [file sj-pdf-17-msj-10.1177_13524585221134213.pdf]

**Table S10:** Estimates, their standard (std.) errors, test statistic values (z), p-values and 95% confidence intervals for logit transformed sensitivity and specificity of  $\kappa$ -FLC index and OCB obtained by the bivariate mixed model separately for platform as well as the retransformed sensitivity and specificity estimates.

### 1) Turbidimetry

| A1)<br>Variables in the estimation equation                     | Estimate | Std. Error | z       | p-value | 95% Confidence Interval |             |
|-----------------------------------------------------------------|----------|------------|---------|---------|-------------------------|-------------|
|                                                                 |          |            |         |         | lower limit             | upper limit |
| logit(sensitivity) ( $\kappa$ -FLC index)                       | 1.667    | 0.273      | 6.118   | < 0.001 | 1.133                   | 2.201       |
| logit(sensitivity) (difference of $\kappa$ -FLC index to OCB)   | -0.388   | 0.386      | -1.004  | 0.316   | -0.145                  | 0.369       |
| logit(1- specificity) ( $\kappa$ -FLC index)                    | -1.803   | 0.167      | -10.783 | < 0.001 | -2.131                  | -1.475      |
| logit(1-specificity) (difference of $\kappa$ -FLC index to OCB) | -0.546   | 0.246      | -2.224  | 0.026   | -1.028                  | -0.065      |

Note: The reference is  $\kappa$ -FLC index and Turbidimetry is fixed.

| B1)                 | Sensitivity (estimated mean) | Specificity (estimated mean) |
|---------------------|------------------------------|------------------------------|
| $\kappa$ -FLC index | 0.841                        | 0.859 <sup>a</sup>           |
| OCB                 | 0.782                        | 0.913 <sup>a</sup>           |

Note: <sup>a</sup> this difference is statistically significant ( $p = 0.026$ ).

### 1) Nephelometry

| A2)<br>Variables in the estimation equation                     | Estimate | Std. Error | z       | p-value | 95% Confidence Interval |             |
|-----------------------------------------------------------------|----------|------------|---------|---------|-------------------------|-------------|
|                                                                 |          |            |         |         | lower limit             | upper limit |
| logit(sensitivity) ( $\kappa$ -FLC index)                       | 2.242    | 0.201      | 11.151  | < 0.001 | 1.848                   | 2.637       |
| logit(sensitivity) (difference of $\kappa$ -FLC index to OCB)   | -0.091   | 0.287      | 0.318   | 0.750   | -0.471                  | 0.654       |
| logit(1- specificity) ( $\kappa$ -FLC index)                    | -2.216   | 0.197      | -11.240 | < 0.001 | -2.603                  | -1.830      |
| logit(1-specificity) (difference of $\kappa$ -FLC index to OCB) | -0.260   | 0.288      | -0.906  | 0.365   | -0.824                  | 0.303       |

Note: The reference is  $\kappa$ -FLC index and Nephelometry is fixed.

| B2)                 | Sensitivity (estimated mean) | Specificity (estimated mean) |
|---------------------|------------------------------|------------------------------|
| $\kappa$ -FLC index | 0.904                        | 0.902                        |
| OCB                 | 0.912                        | 0.922                        |

Legend: The bivariate mixed model is computed with the logit-transformed quantities of sensitivity and specificity and estimated via REML (restricted maximum likelihood), these estimates are provided in A). After re-transformation the quantities are easier to interpret and given in B).

*Abbreviations:* FLC, free light chain; OCB, oligoclonal bands
