# Supplementary material for: Cerebrospinal fluid kappa free light chains for the diagnosis of multiple sclerosis: A systematic review and meta-analysis
Source: PubMed Central journal article supplement — Mult Scler. 2022 Dec 1;29(2):169–81. doi: 10.1177/13524585221134213 (PMC9925892; doi:10.1177/13524585221134213), 2022-12-01
Supplement: sj-pdf-18-msj-10.1177_13524585221134213.pdf [file sj-pdf-18-msj-10.1177_13524585221134213.pdf]

**Figure S1:** Comparison of the diagnostic accuracy of  $\kappa$ -FLC index with OCB according to subgroups of CIS patients, MS patients and mixed cohorts of CIS/ MS patients

Legend:

Bivariate summary estimates of sensitivity and specificity for  $\kappa$ -FLC index with OCB and the corresponding 95% confidence ellipse around these mean values are shown as well as the original data of the meta-analysis, together with the corresponding sROC curves if appropriate.

*Abbreviations:* FLC, free light chains, OCB, oligoclonal bands; sROC, summary receiver operating curves

**Figure S2:** Comparison of the diagnostic accuracy of  $\kappa$ -FLC index with OCB according to subgroups of non-inflammatory and inflammatory/ non-inflammatory controls

Legend:

Bivariate summary estimates of sensitivity and specificity for  $\kappa$ -FLC index with OCB and the corresponding 95% confidence ellipse around these mean values are shown as well as the original data of the meta-analysis, together with the corresponding sROC curves if appropriate.

*Abbreviations:* FLC, free light chains, OCB, oligoclonal bands; sROC, summary receiver operating curves

**Figure S3:** Cut-off for  $\kappa$ -FLC index to discriminate CIS/ MS patients from controls

Legend:

Bivariate summary estimates of sensitivity and specificity for  $\kappa$ -FLC index are shown as well as the original data of the meta-analysis studies together with the sROC curve. The elliptical confidence interval around the mean values is plotted at the 99%, 95% and 90% confidence level. The weighted average cut-off of all studies within the 99% elliptical confidence interval is provided.

*Abbreviations:* FLC, free light chain; sROC, summary receiver operating curves

**Figure S4:** Forest plot of studies comparing the diagnostic accuracy of IF <sub>$\kappa$ -FLC</sub> and OCB

Legend:

In the left column forest plot of sensitivities for the studies included in the meta-analysis are shown for IF <sub>$\kappa$ -FLC</sub> (above) and OCB (below); in the right column forest plot of specificities for the studies included in the meta-analysis for IF <sub>$\kappa$ -FLC</sub> (above) and OCB (below) are provided. Confidence intervals are computed at a 95% confidence level.

*Abbreviations:* IF, intrathecal fraction; FLC, free light chains, OCB, oligoclonal bands

**Figure S5:** Comparison of the diagnostic accuracy of IF<sub>κ-FLC</sub> with OCB to identify CIS/ MS patients

Legend:

Bivariate summary estimates of sensitivity and specificity for IF<sub>κ-FLC</sub> with OCB and the corresponding 95% confidence ellipse around these mean values are shown as well as the original data of the meta-analysis together with the corresponding sROC curves.

*Abbreviations:* IF, intrathecal fraction; FLC, free light chains, OCB, oligoclonal bands; sROC, summary receiver operating curves

**Figure S6:** Forest plot of studies comparing the diagnostic accuracy of CSF κ-FLC concentration and OCB

Legend:

In the left column forest plot of sensitivities for the studies included in the meta-analysis are shown for CSF κ-FLC concentration (above) and OCB (below); in the right column forest plot of specificities for the studies included in the meta-analysis for CSF κ-FLC concentration (above) and OCB (below) are provided. Confidence intervals are computed at a 95% confidence level.

*Abbreviations:* CSF, cerebrospinal fluid; FLC, free light chains, OCB, oligoclonal bands

**Figure S7:** Comparison of the diagnostic accuracy of CSF  $\kappa$ -FLC concentration with OCB to identify CIS/ MS patients

Legend:

Bivariate summary estimates of sensitivity and specificity for CSF  $\kappa$ -FLC concentration with OCB and the corresponding 95% confidence ellipse around these mean values are shown as well as the original data of the meta-analysis together with the corresponding sROC curves.

*Abbreviations:* CSF, cerebrospinal fluid; FLC, free light chains, OCB, oligoclonal bands; sROC, summary receiver operating curves

**Figure S8:** Cut-off for the CSF  $\kappa$ -FLC concentration to discriminate CIS/ MS patients from controls

Legend:

Bivariate summary estimates of sensitivity and specificity for CSF  $\kappa$ -FLC concentration are shown as well as the original data of the meta-analysis studies together with the sROC curve. The elliptical confidence interval around the mean values is plotted at the 99%, 95% and 90% confidence level. The weighted average cut-off of all studies within the 99% elliptical confidence interval is provided.

*Abbreviations:* CSF, cerebrospinal fluid; FLC, free light chain; sROC, summary receiver operating curves

**Figure S9:** Forest plot of studies comparing the diagnostic accuracy of  $Q_{\kappa\text{-FLC}}$  and OCB

Legend:

In the left column forest plot of sensitivities for the studies included in the meta-analysis are shown for  $Q_{\kappa\text{-FLC}}$  (above) and OCB (below); in the right column forest plot of specificities for the studies included in the meta-analysis for  $Q_{\kappa\text{-FLC}}$  (above) and OCB (below) are provided. Confidence intervals are computed at a 95% confidence level.

*Abbreviations:*  $Q_{\kappa\text{-FLC}}$ , cerebrospinal fluid/ serum  $\kappa$ -FLC quotient; FLC, free light chains, OCB, oligoclonal bands

**Figure S10:** Comparison of the diagnostic accuracy of different  $\kappa$ -FLC measures to identify CIS/ MS patients

Legend:

Bivariate summary estimates of sensitivity and specificity for A)  $\kappa$ -FLC index with CSF  $\kappa$ -FLC concentration, B)  $IF_{\kappa\text{-FLC}}$  with CSF  $\kappa$ -FLC concentration and C)  $\kappa$ -FLC index with  $IF_{\kappa\text{-FLC}}$  are shown, as well as the corresponding 95% confidence ellipse around these mean values and the original data of the meta-analysis.

*Abbreviations:* CSF, cerebrospinal fluid; FLC, free light chains,
