# Supplementary material for: Cerebrospinal fluid kappa free light chains for the diagnosis of multiple sclerosis: A systematic review and meta-analysis
Source: PubMed Central journal article supplement — Mult Scler. 2022 Dec 1;29(2):169–81. doi: 10.1177/13524585221134213 (PMC9925892; doi:10.1177/13524585221134213), 2022-12-01
Supplement: sj-pdf-19-msj-10.1177_13524585221134213.pdf [file sj-pdf-19-msj-10.1177_13524585221134213.pdf]

## Calculation of intrathecal $\kappa$ -FLC synthesis

Different approaches that consider serum  $\kappa$ -FLC concentrations and/ or blood-CSF-barrier function have been used to calculate an intrathecal  $\kappa$ -FLC synthesis. Blood-CSF-barrier function was assessed by the CSF/ serum albumin quotient ( $Q_{alb}$ ).

### (1) $\kappa$ -FLC quotient

$$Q_{\kappa-FLC} = \frac{CSF \ \kappa-FLC}{Serum \ \kappa-FLC} \quad \text{Eq. (1)}$$

The presence of an intrathecal  $\kappa$ -FLC synthesis is determined by referring each patient's  $Q_{\kappa-FLC}$  to a pre-defined cut-off. The extent of the  $\kappa$ -FLC synthesis is reflected by the exact  $Q_{\kappa-FLC}$  value.

### (2) $\kappa$ -FLC index

$$\kappa - FLC \ index = \frac{\kappa-FLC_{CSF} / \kappa-FLC_{Serum}}{Q_{alb}} \quad \text{Eq.(2)}$$

The presence of an intrathecal  $\kappa$ -FLC synthesis is determined by referring each patient's  $\kappa$ -FLC index to a pre-defined cut-off. The extent of the  $\kappa$ -FLC synthesis is reflected by the exact index value.

### (3) Intrathecal $\kappa$ -FLC fraction

The presence and extent of an intrathecal  $\kappa$ -FLC synthesis is calculated by a non-linear function relating each  $Q_{\kappa-FLC}$  to its corresponding  $Q_{alb}$ -dependent upper normal limit ( $Q_{lim \ \kappa-FLC}$ ).  $Q_{lim \ \kappa-FLC}$  has been previously defined by different formulae:

$$\text{Presslauer 2014} \quad Q_{lim \ \kappa-FLC} = 0.9357 \cdot Q_{alb}^{0.6687} \quad \text{Eq. (3)}$$

$$\text{Hegen 2019} \quad Q_{lim \ \kappa-FLC} = 3.1276 \cdot Q_{alb}^{0.8001} \quad \text{Eq. (4)}$$

$$\text{Senel 2019} \quad Q_{lim \ \kappa-FLC} = 9.50 + 2.08 \cdot Q_{alb} \quad \text{Eq. (5)}$$

$$\text{Reiber 2019} \quad Q_{lim \ \kappa-FLC} = 3.27 \cdot (Q_{alb}^2 + 33)^{0.5} - 8.2 \cdot 10^{-3} \quad \text{Eq. (6)}$$

Locally produced  $\kappa$ -FLC concentration in CSF is calculated as the difference of  $Q_{\kappa\text{-FLC}}$  to  $Q_{\text{lim } \kappa\text{-FLC}}$  and corrected for absolute  $\kappa$ -FLC serum concentration:

$$\kappa\text{-FLC}_{Loc} = (Q_{\kappa\text{-FLC}} - Q_{\text{lim } \kappa\text{-FLC}}) \cdot \kappa\text{-FLC}_{Serum} \quad \text{Eq. (7)}$$

Finally, the relative intrathecal  $\kappa$ -FLC fraction ( $IF_{\kappa\text{-FLC}}$ ) is displayed as percentage according to following formula:

$$IF_{\kappa\text{-FLC}} = \frac{\kappa\text{-FLC}_{Loc}}{\kappa\text{-FLC}_{CSF}} \cdot 100 \quad \text{Eq. (8)}$$
