# Supplementary figures and images for: Cerebrospinal fluid kappa free light chains for the diagnosis of multiple sclerosis: A systematic review and meta-analysis
Source: PubMed Central journal article supplement — Mult Scler. 2022 Dec 1;29(2):169–81. doi: 10.1177/13524585221134213 (PMC9925892; doi:10.1177/13524585221134213), 2022-12-01

Cut-off for  $\kappa$ -FLC index

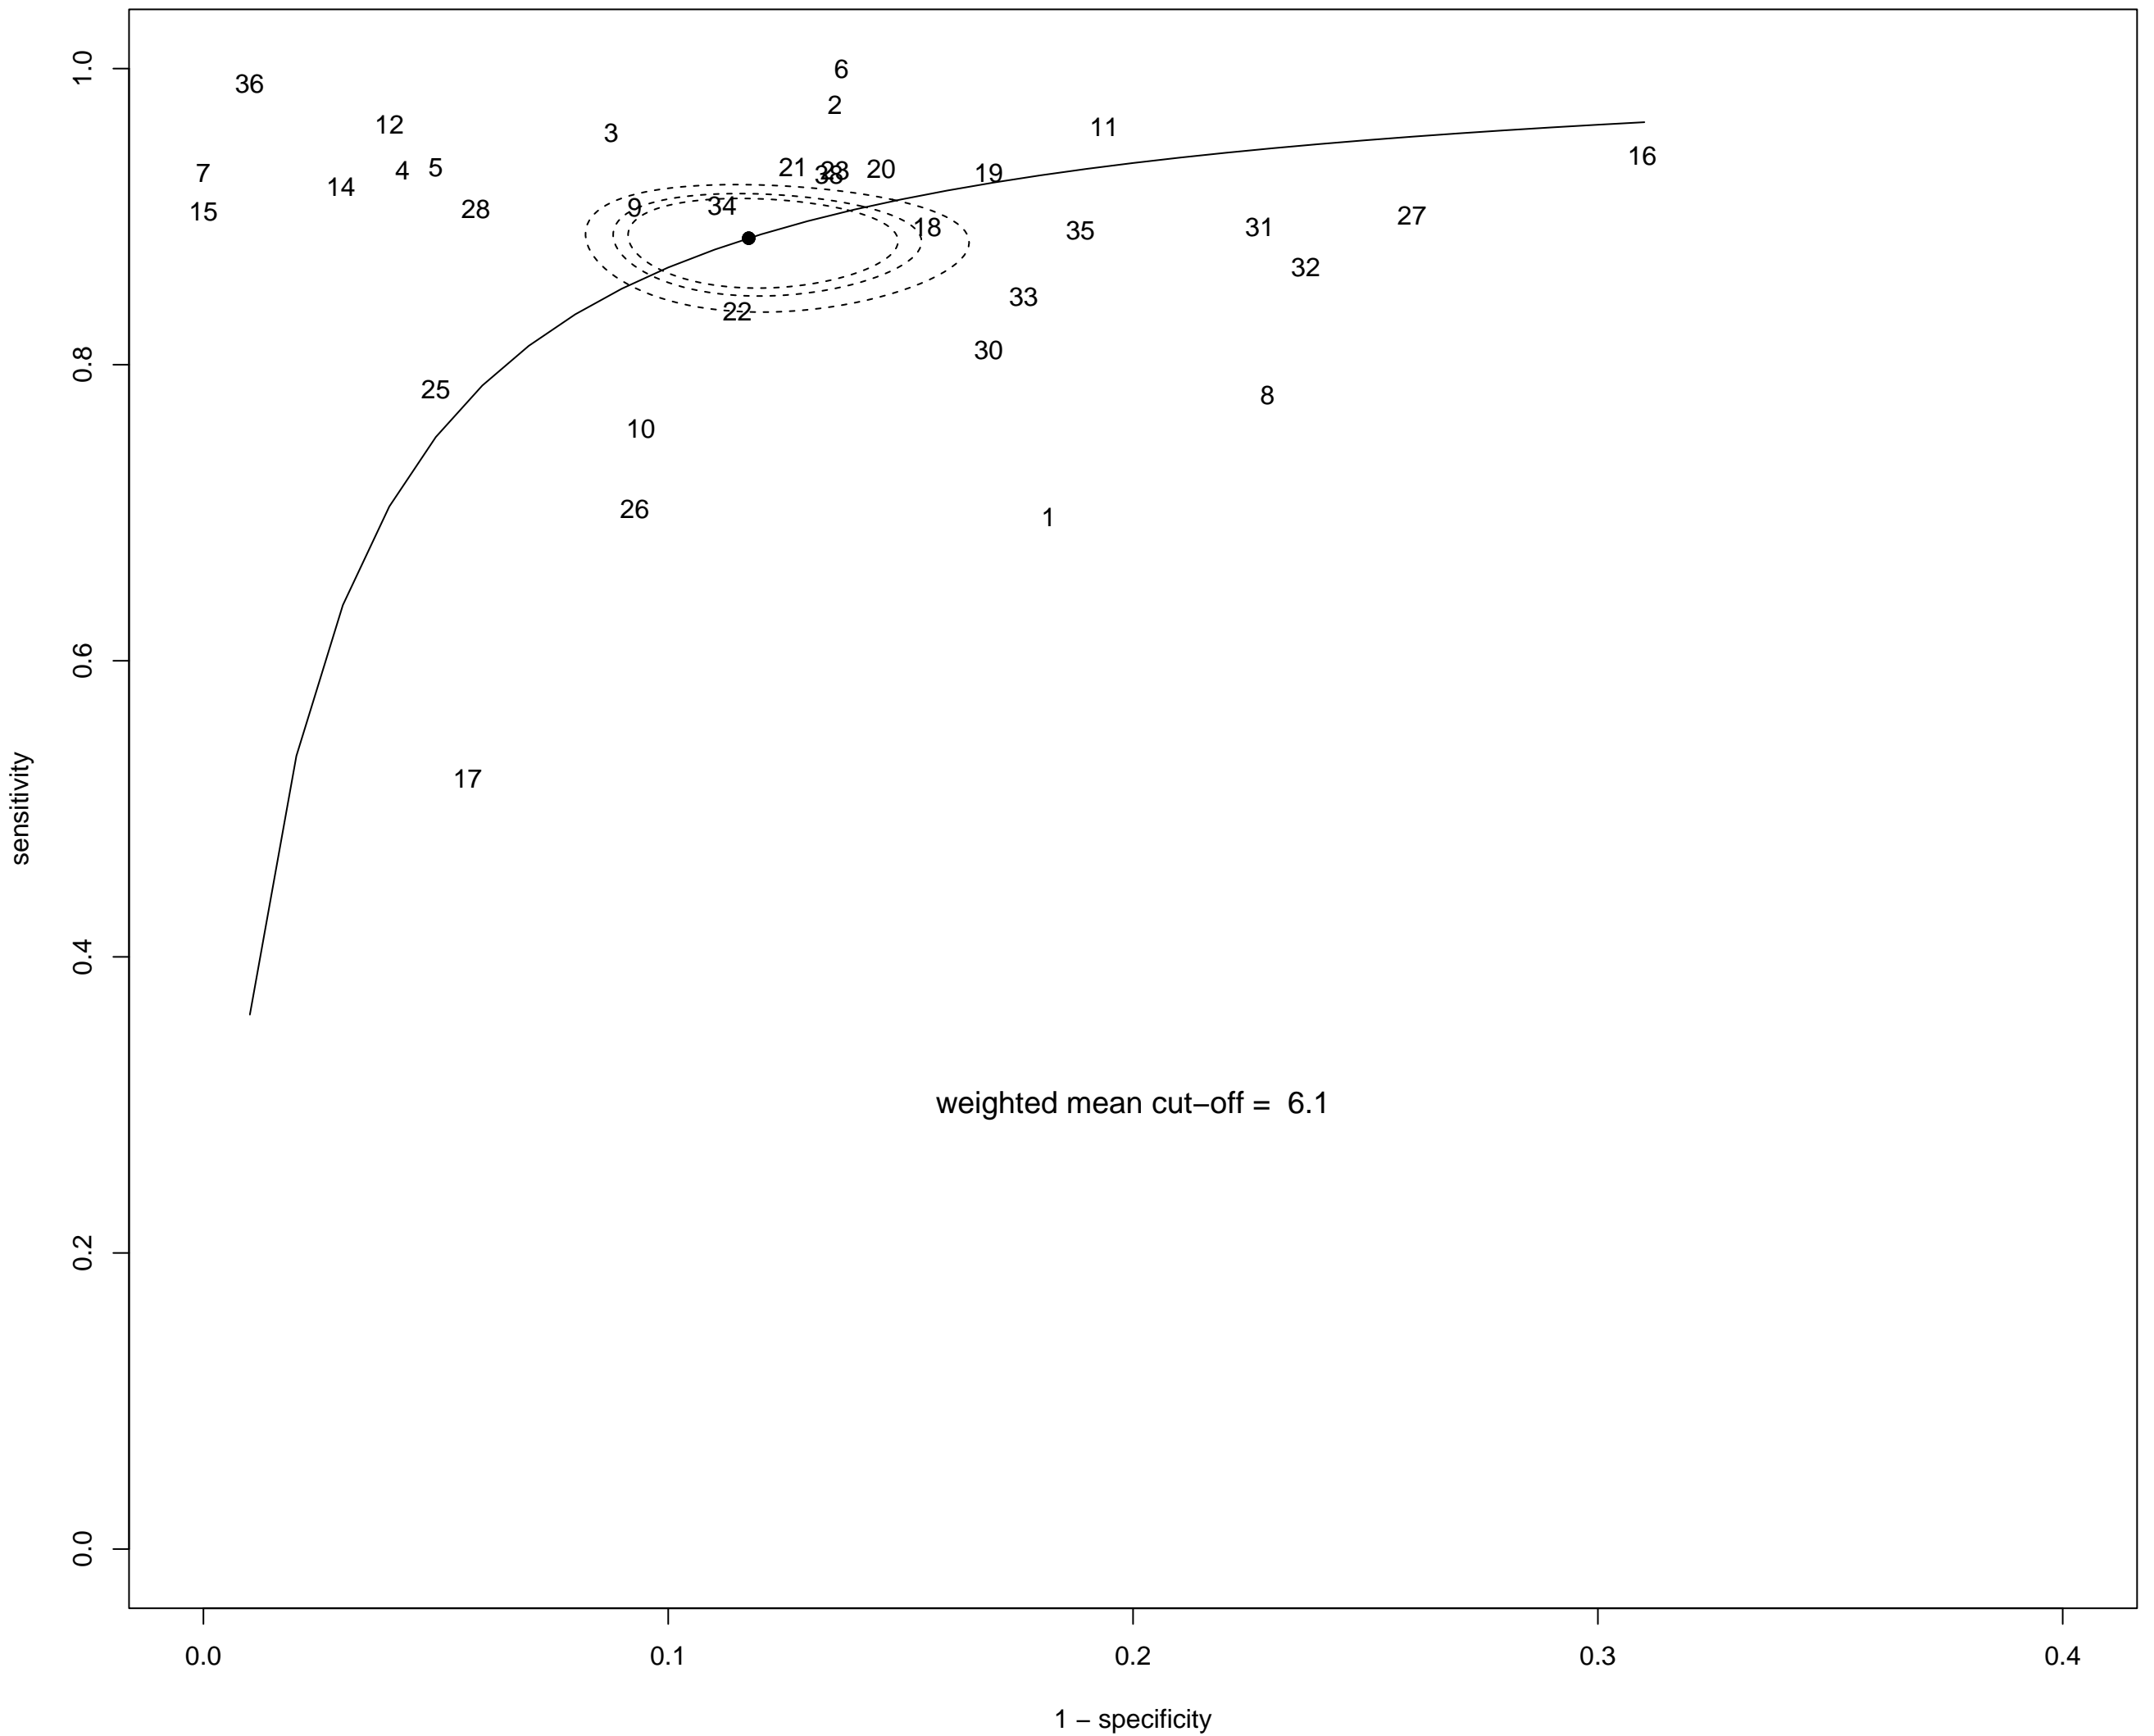

Supplement: sj-pdf-3-msj-10.1177_13524585221134213.pdf [file sj-pdf-3-msj-10.1177_13524585221134213.pdf]

## κ-FLC IF

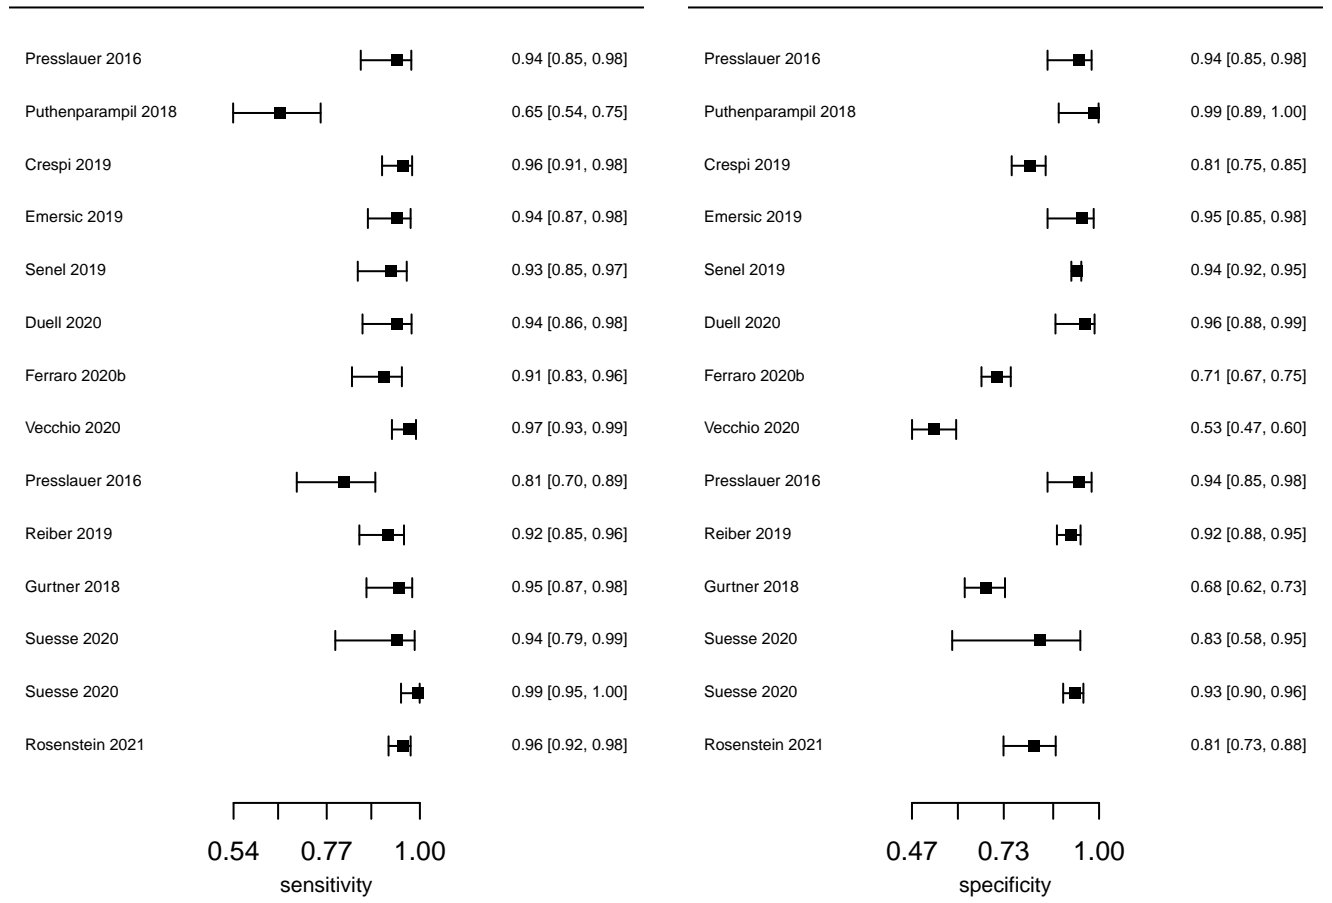

## OCB

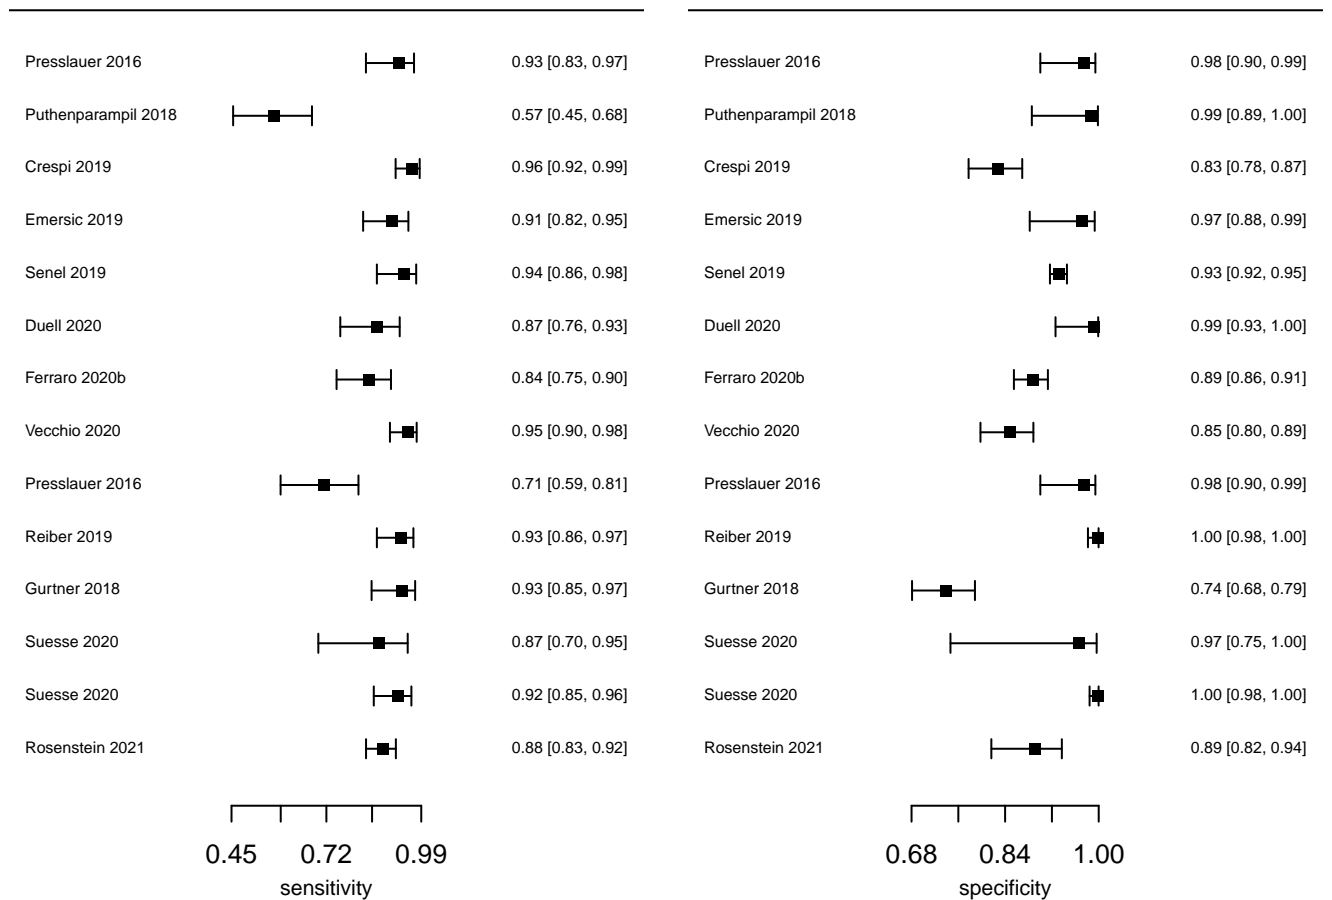

Supplement: sj-pdf-4-msj-10.1177_13524585221134213.pdf [file sj-pdf-4-msj-10.1177_13524585221134213.pdf]

Comparison of IF  $\kappa$ -FLC and OCB

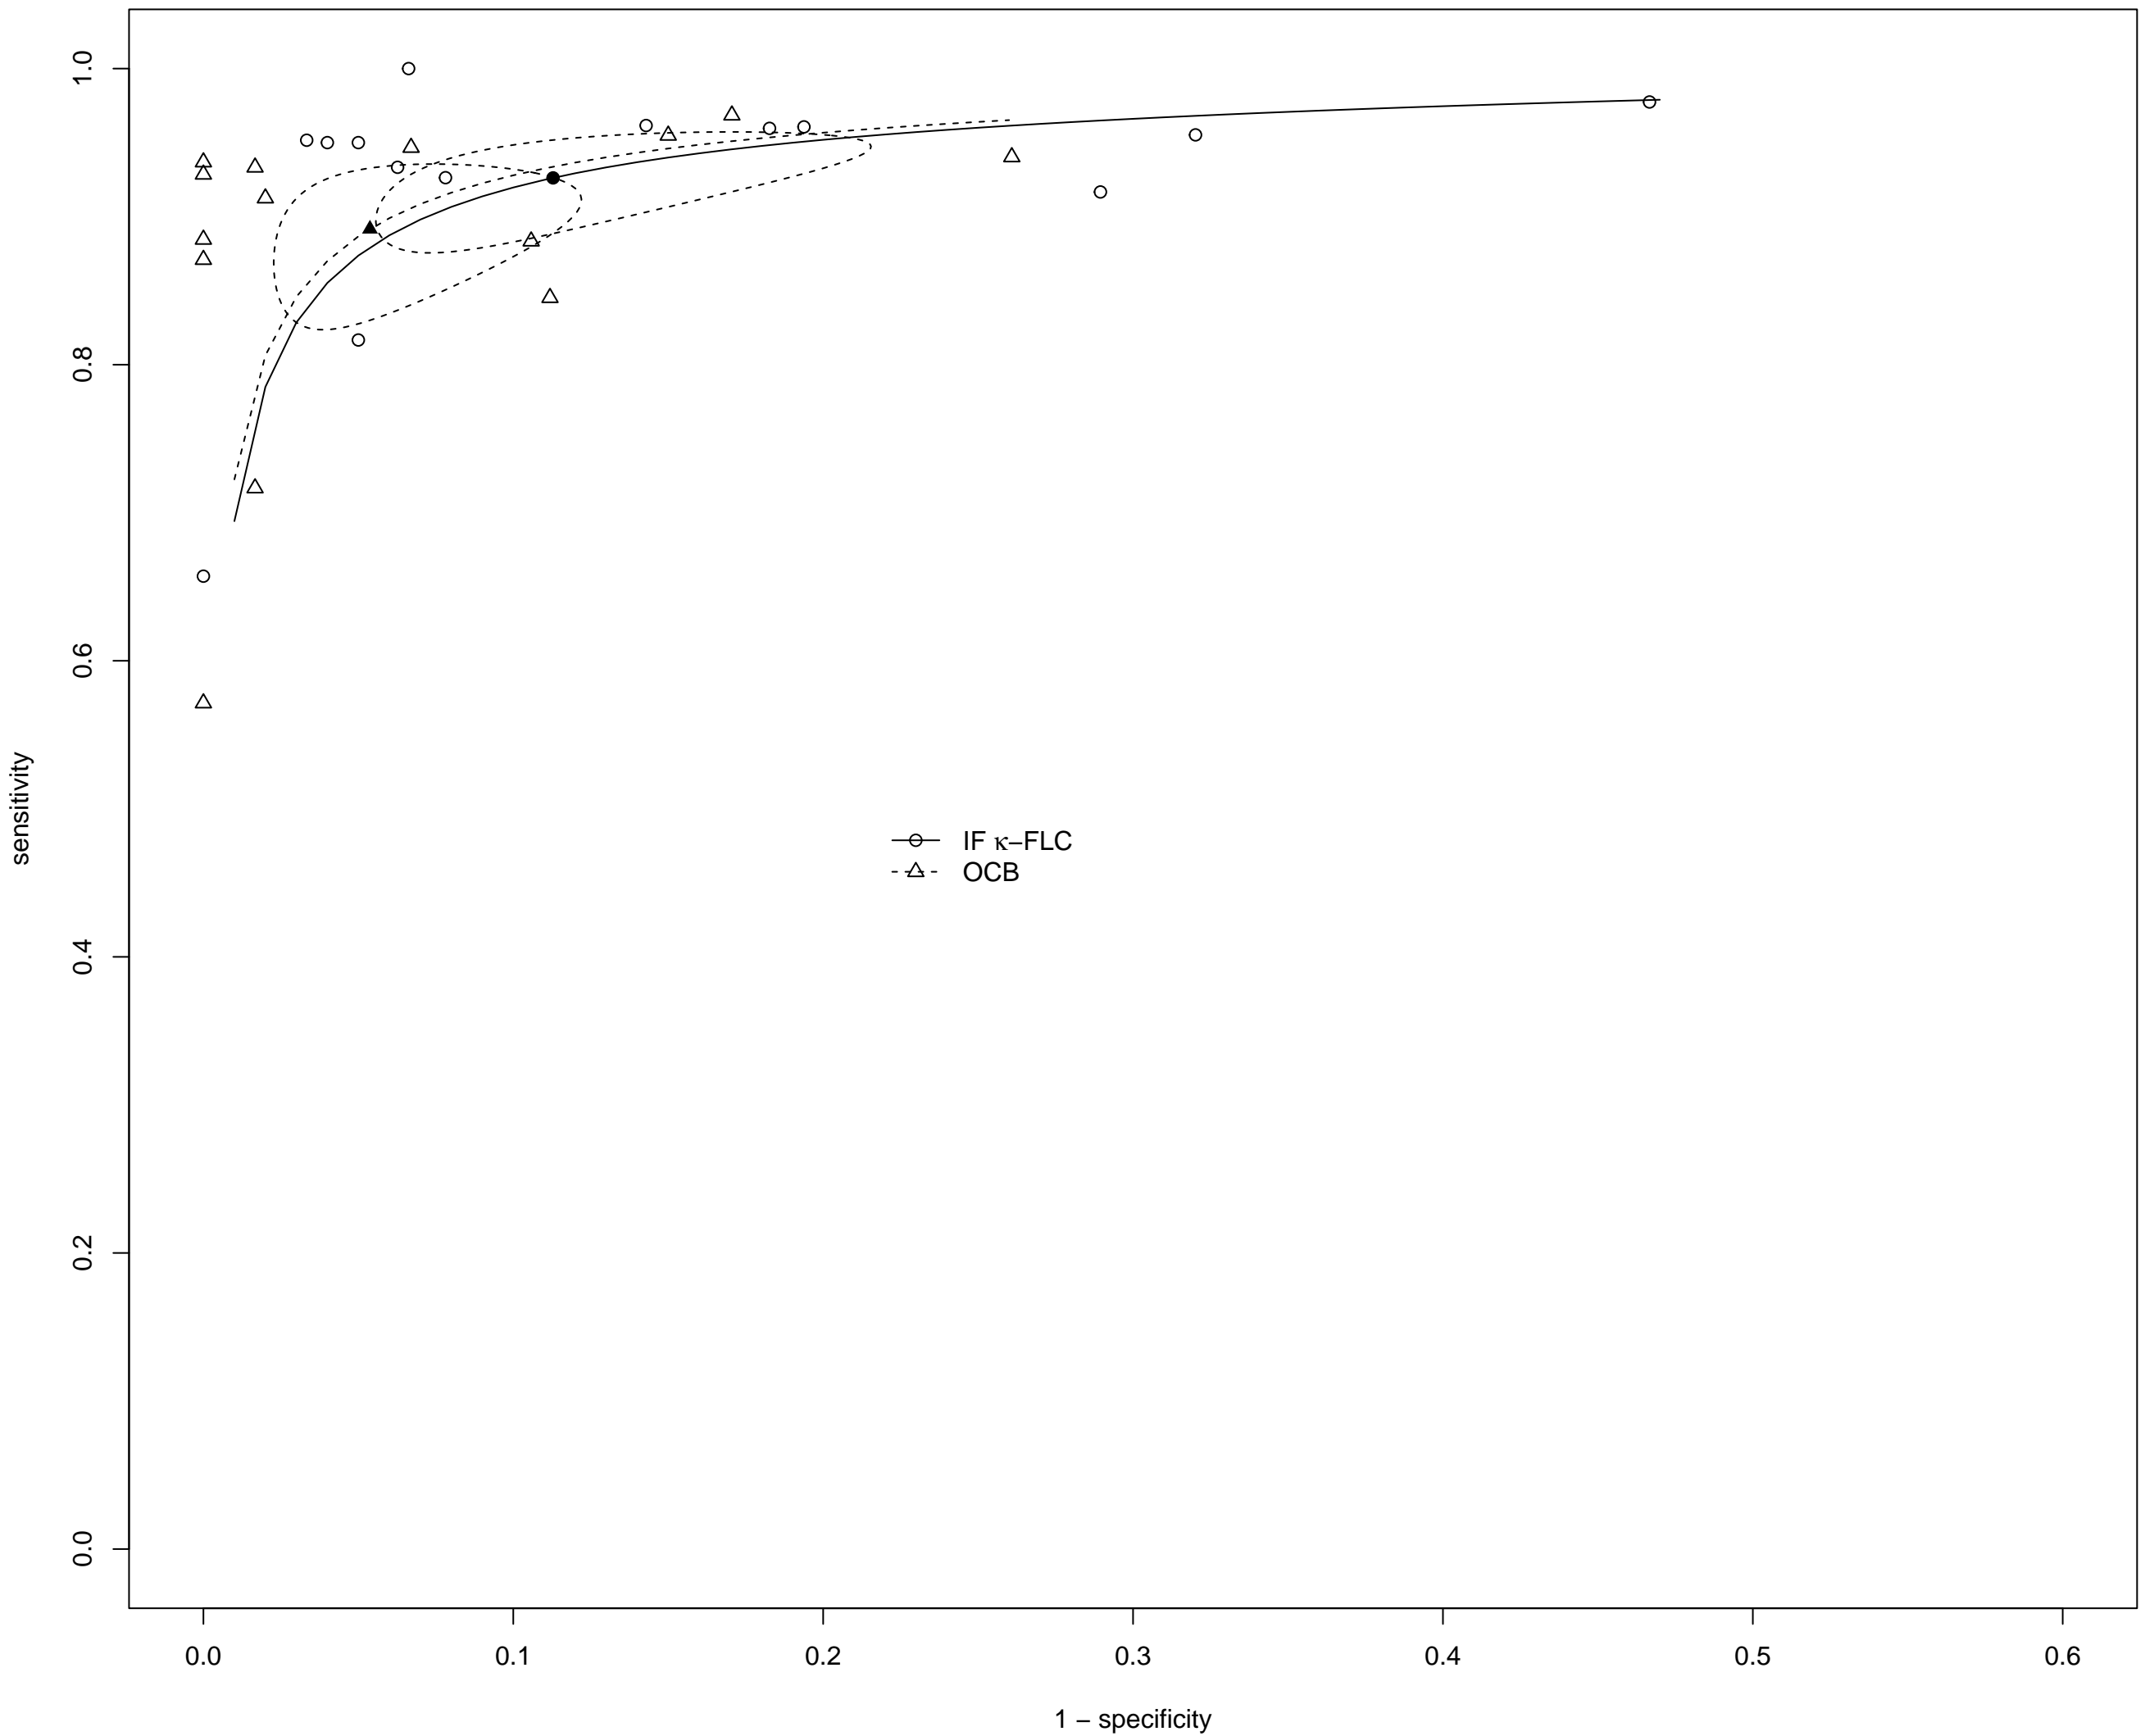

Supplement: sj-pdf-5-msj-10.1177_13524585221134213.pdf [file sj-pdf-5-msj-10.1177_13524585221134213.pdf]

## CSF $\kappa$ -FLC concentration

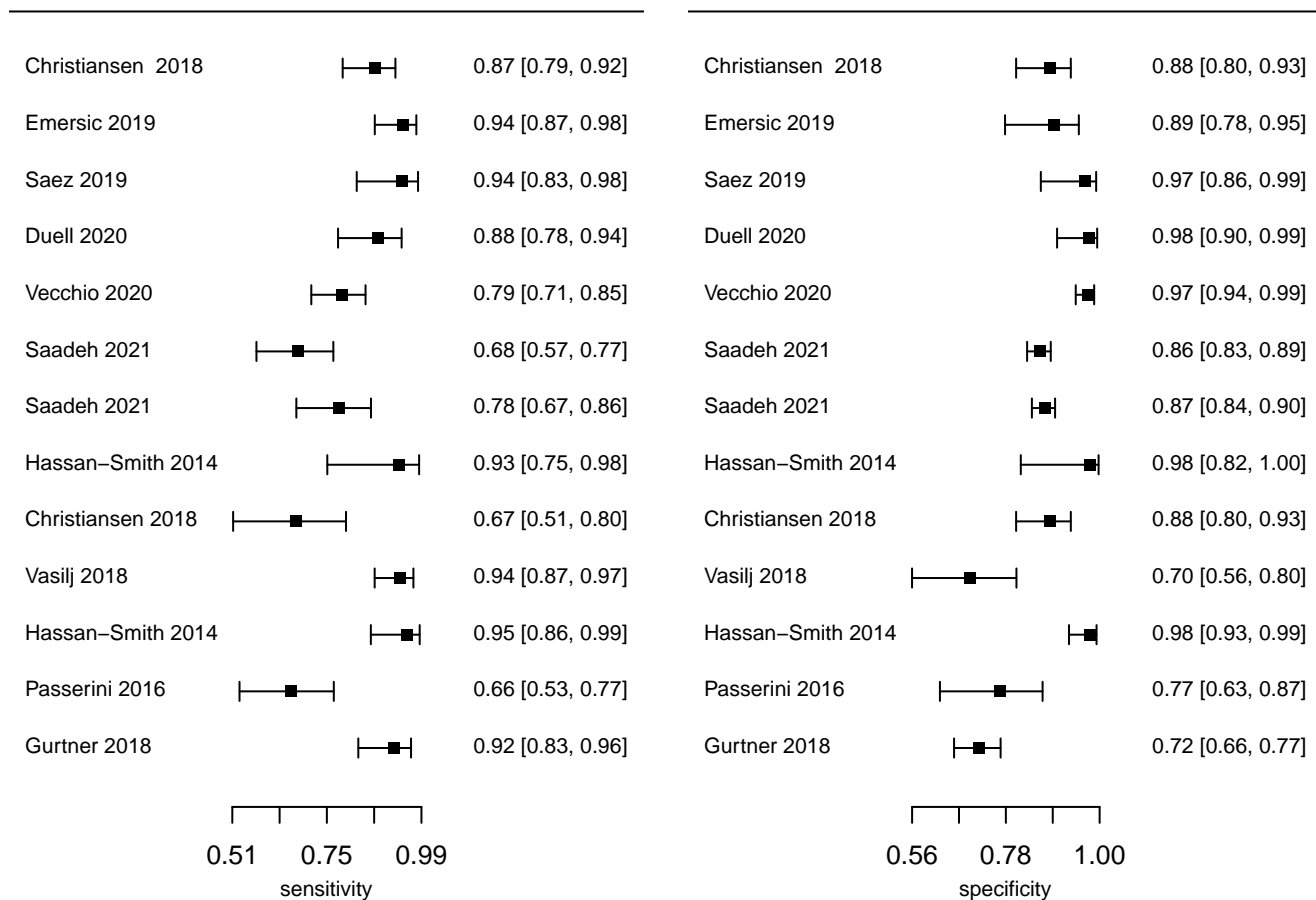

### OCB

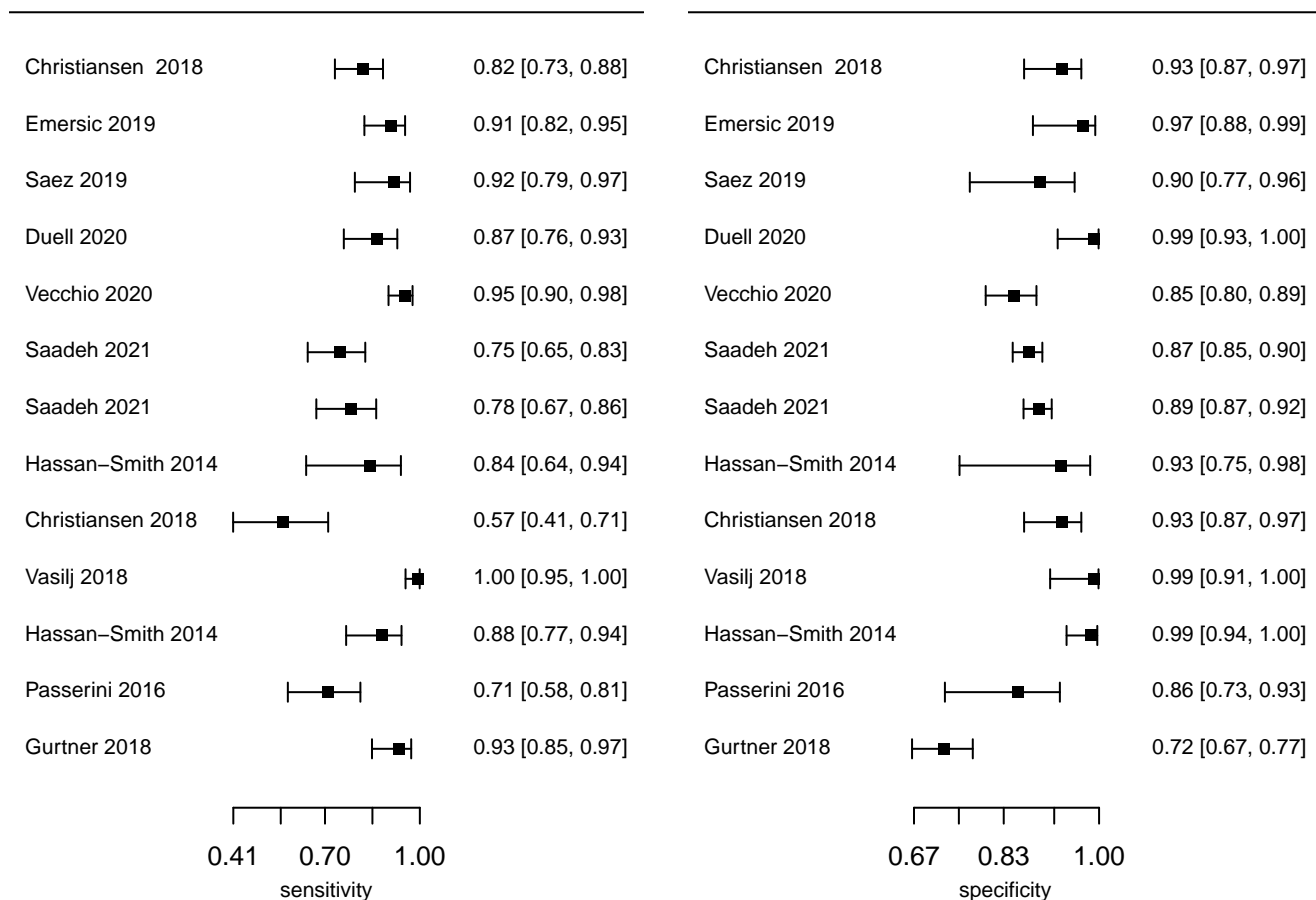

Supplement: sj-pdf-6-msj-10.1177_13524585221134213.pdf [file sj-pdf-6-msj-10.1177_13524585221134213.pdf]

Comparison of CSF  $\kappa$ -FLC concentration and OCB

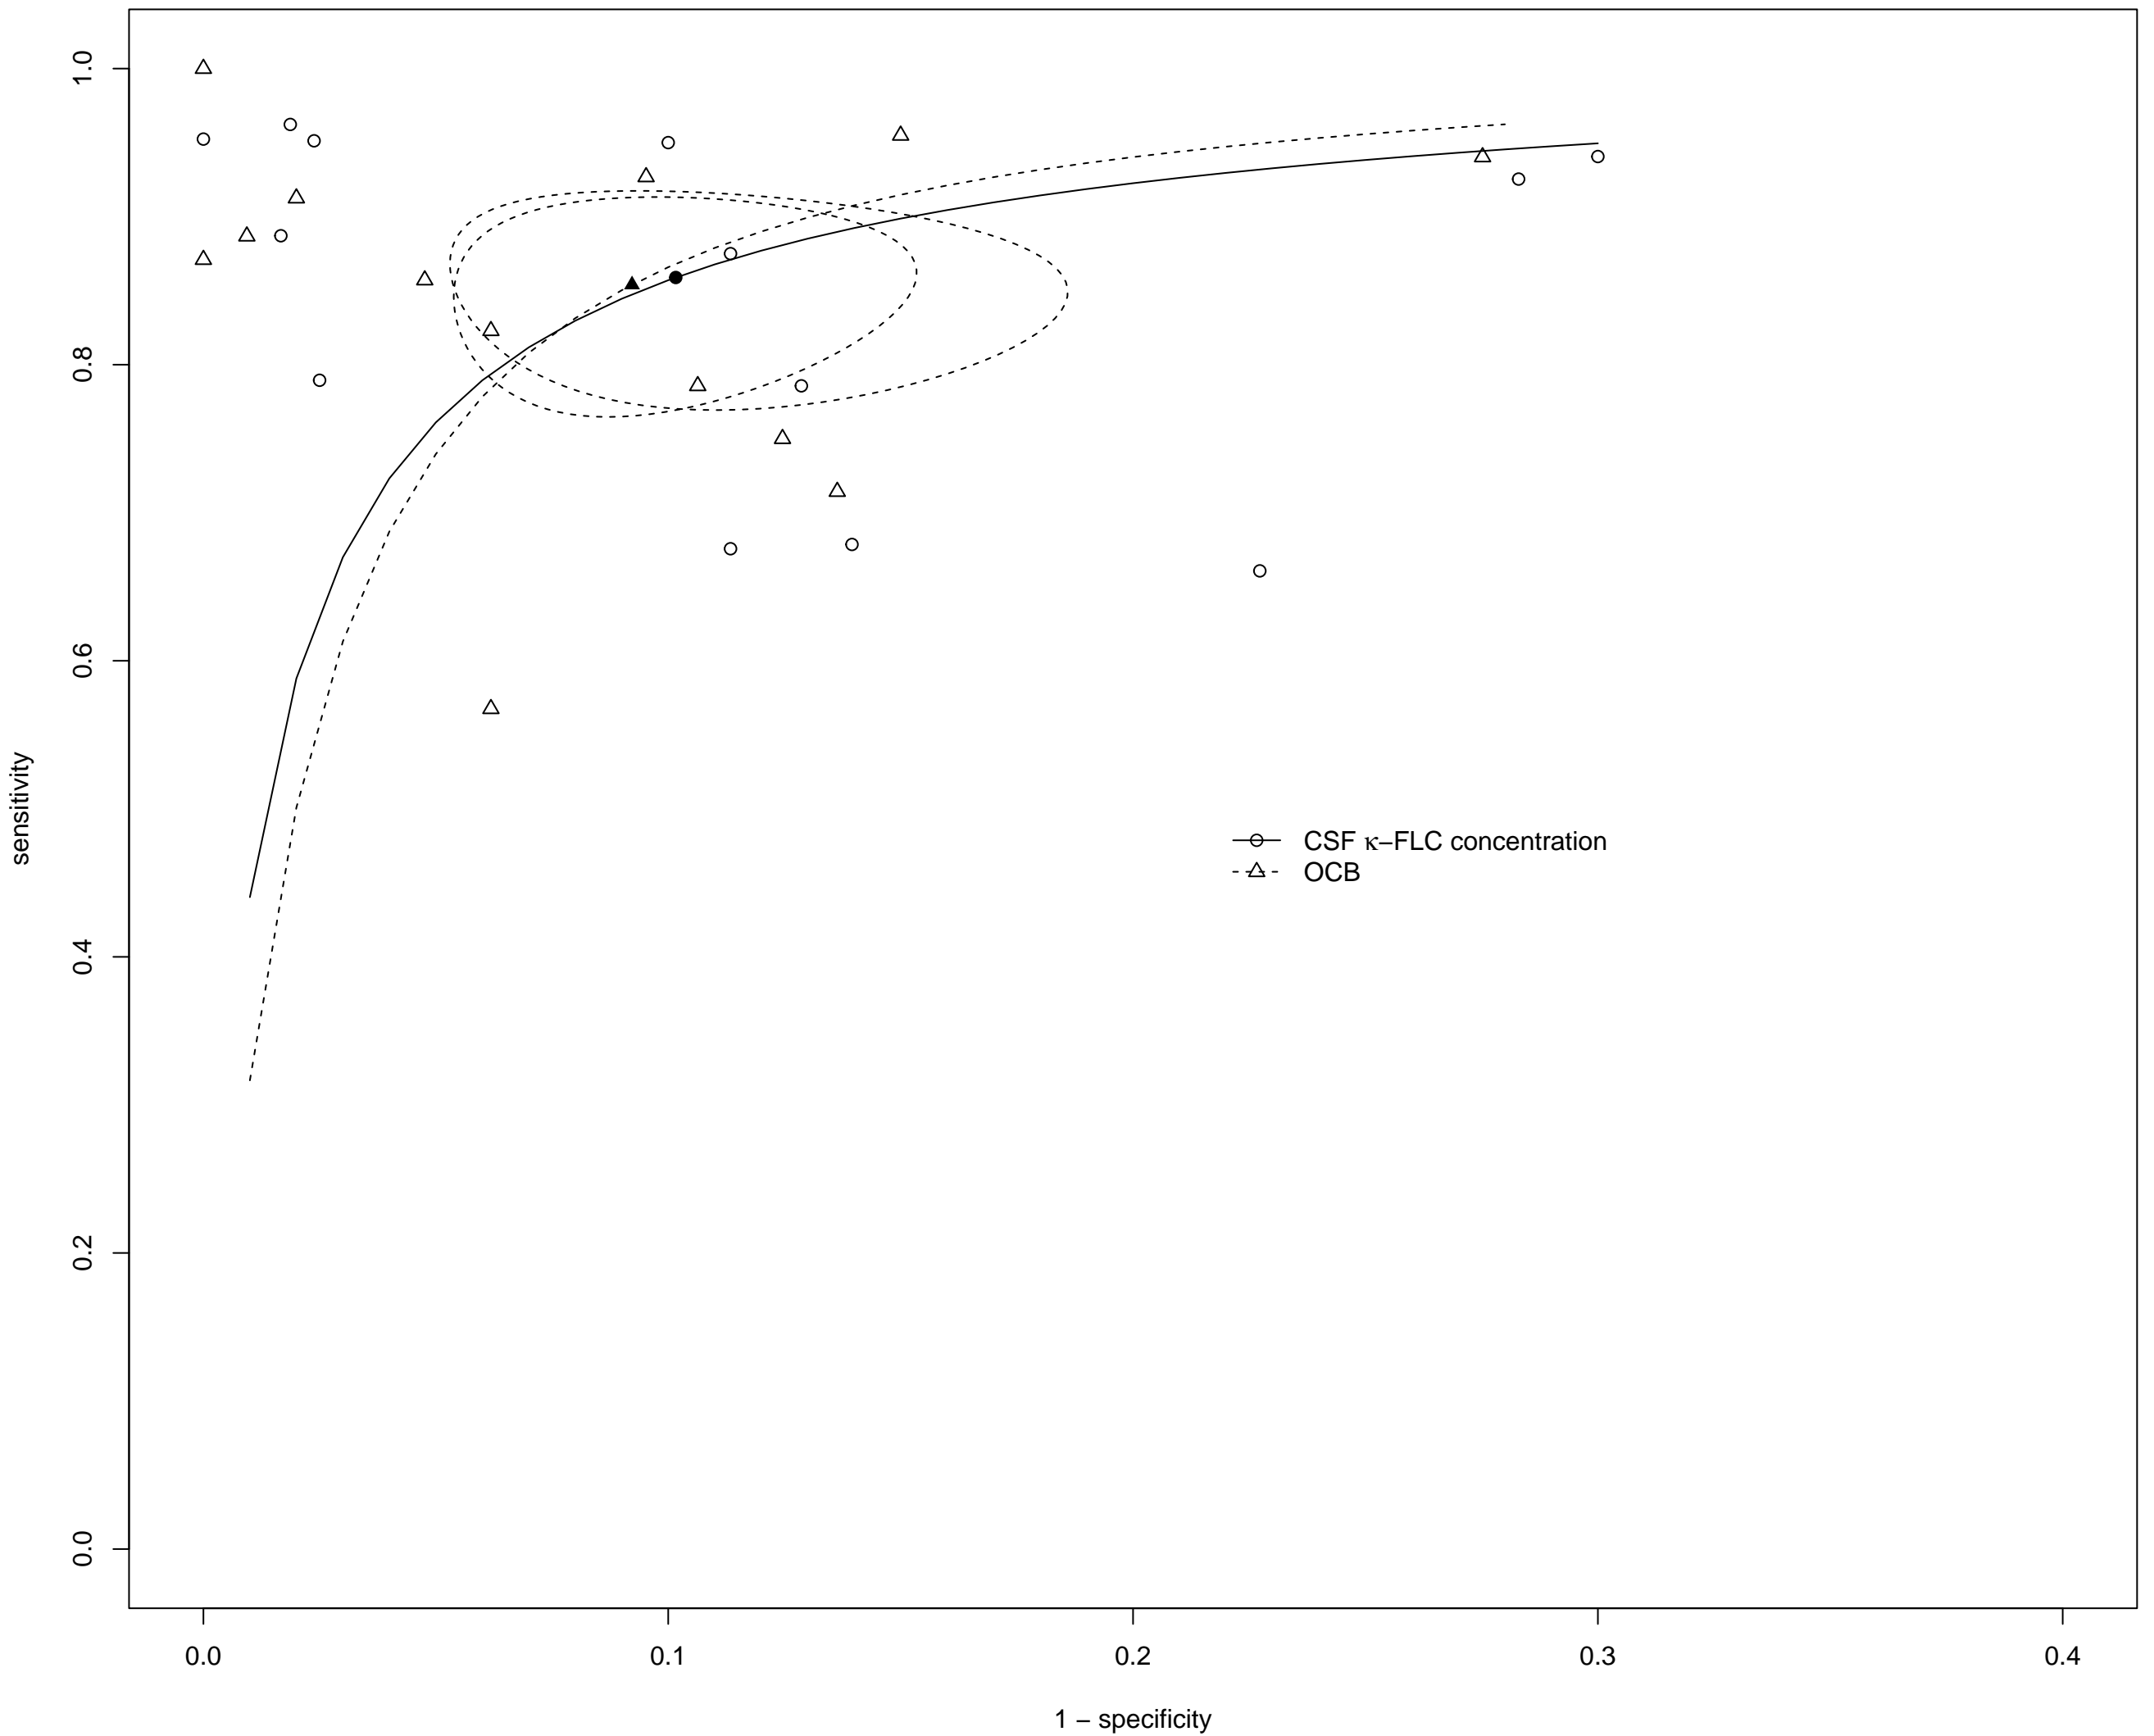

Supplement: sj-pdf-7-msj-10.1177_13524585221134213.pdf [file sj-pdf-7-msj-10.1177_13524585221134213.pdf]

Cut-off for CSF  $\kappa$ -FLC concentration

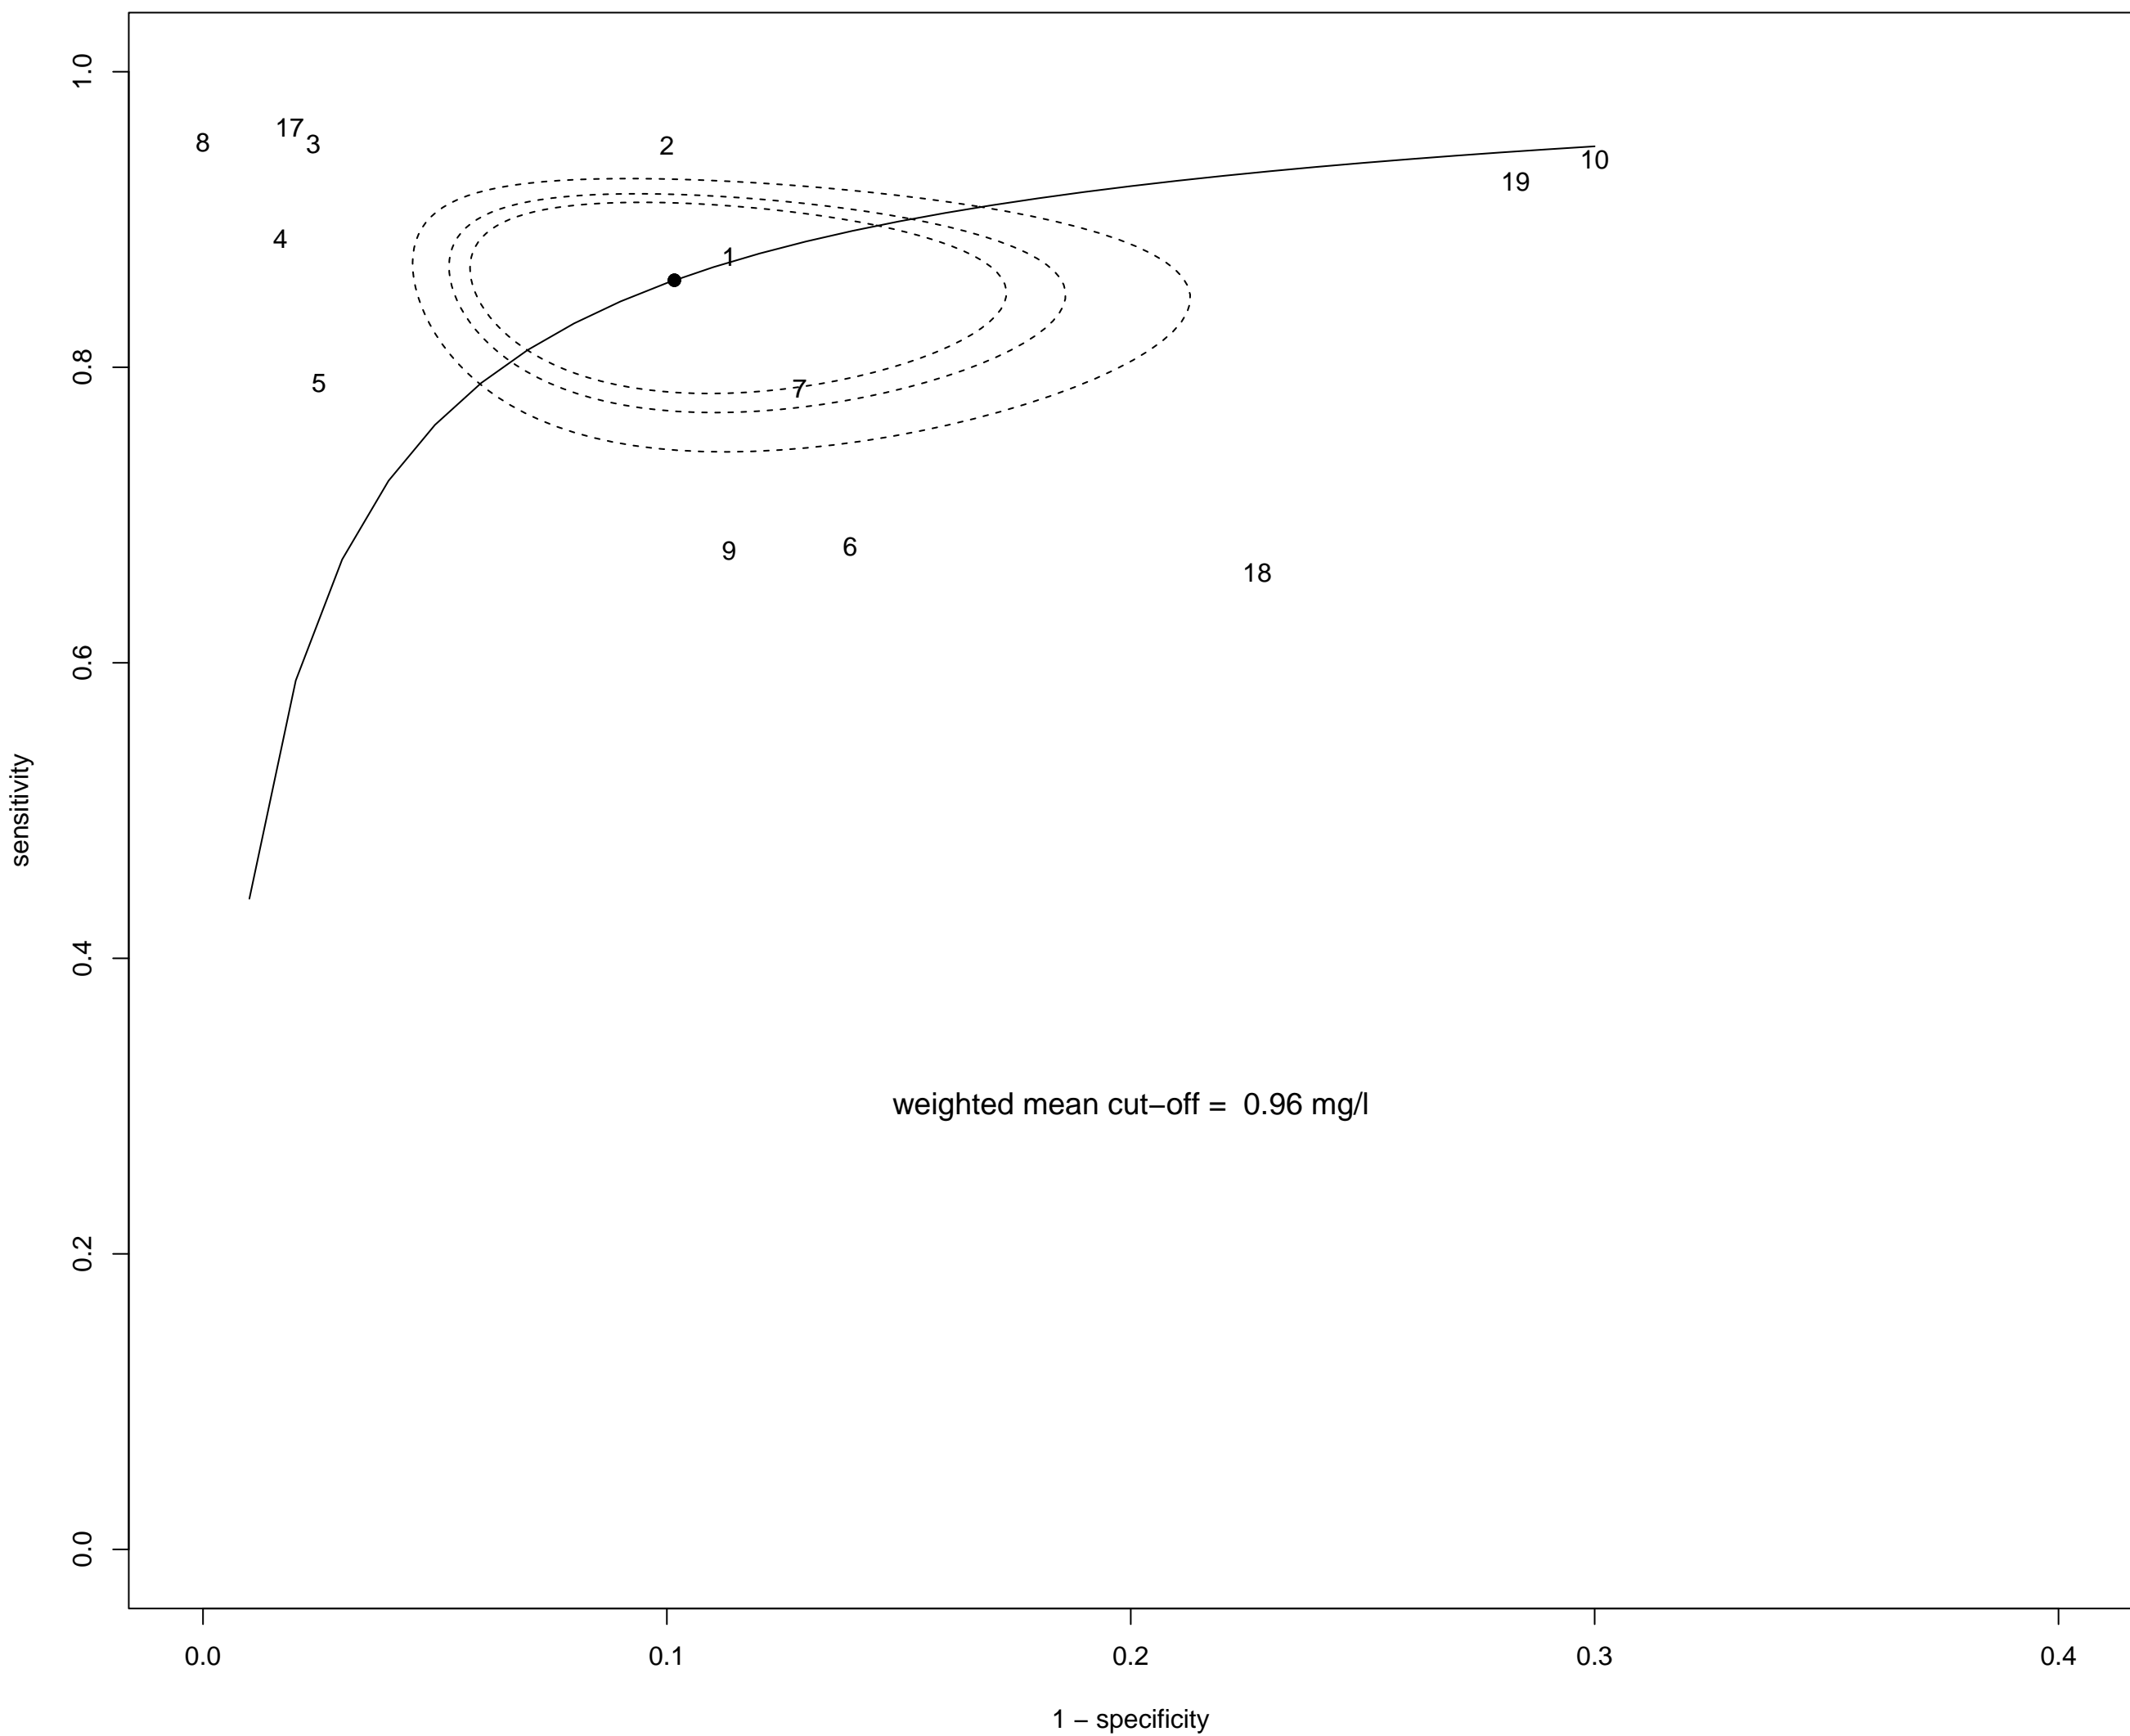

Supplement: sj-pdf-8-msj-10.1177_13524585221134213.pdf [file sj-pdf-8-msj-10.1177_13524585221134213.pdf]
